# Supplementary material
Source: PubMed Central journal article supplement (PMC7324178)
Supplement: jci-130-131992-s088.pdf [file jci-130-131992-s088.pdf]

## Supplemental Figure 1

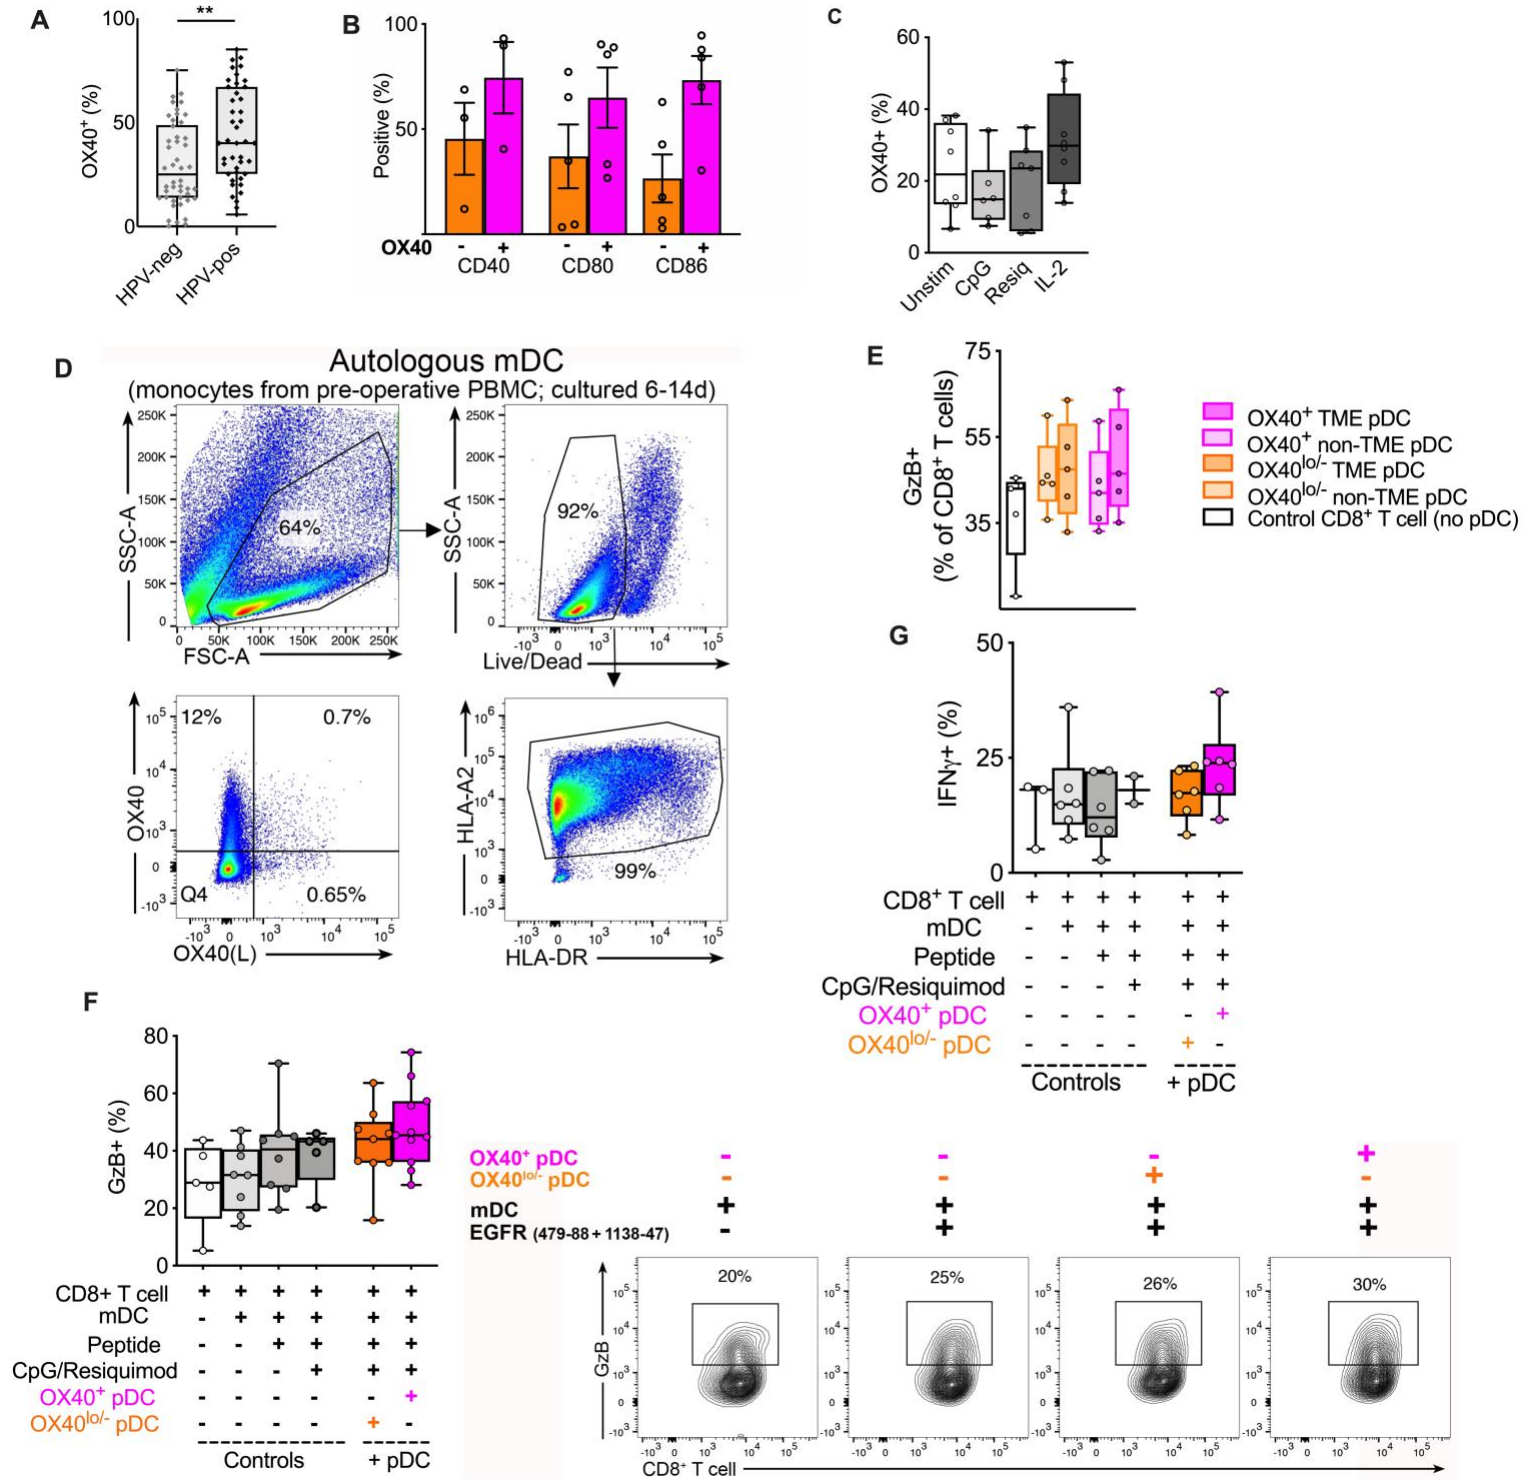

**OX40-status defines a mature pDC population that drives antigen-specific autologous CD8<sup>+</sup> T cell responses.** (a) OX40 expression on intratumoral pDC from HPV-positive (n= 43) and HPV-negative (n= 46) HNSCC patients. (b) Sorted pDC from dLN<sub>neg</sub> from HNSCC patients (n= 5) were incubated overnight and measured by flow cytometry for expression of CD40, CD80 and CD86 on pDC subsets. (c) Expression of OX40 measured on whole pDC from dLN<sub>neg</sub> from HNSCC patients (n=8) after overnight incubation in culture media alone (unstimulated) or in presence of IL-2, CpG or Resiquimod. (d) FACS gating strategy for sorting harvested autologous HLA-DR<sup>+</sup>HLA-A2<sup>+</sup> monocyte-derived dendritic cells (mDC) for use in autologous antigen-specific co-culture assays (Methods). OX40 and OX40(L) expression levels were also measured. (e) CD8<sup>+</sup> T cell positivity for granzyme B (GzB) after co-culture with peptide-loaded mDC without pDC (control) or with

OX40<sup>+</sup> or OX40<sup>lo/-</sup> pDC from the TME vs. non-TME (dLN<sub>neg</sub>) (n= 5). **(f-g)** Percentage of CD8<sup>+</sup> T cells positive for GzB and IFN- $\gamma$  after co-culture with tumor-associated antigen peptide-loaded mDC and with or without autologous OX40<sup>+</sup> or OX40<sup>lo/-</sup> pDC from tumor or dLN<sub>neg</sub> from HNSCC patients (n= 11). One-way ANOVA followed by Tukey's post hoc test (b-c, e-g). Two-tailed paired T test (a). Bar graph data are mean  $\pm$  s.e.m. Middle line of box-and-whisker plot indicates the median, box limits indicate the first and third quartiles, and 'whiskers' indicate 'extreme' for all data points (a, c, e-f). **\*\**P* < 0.01**. Representative flow plots are shown (f).

## Supplemental Figure 2

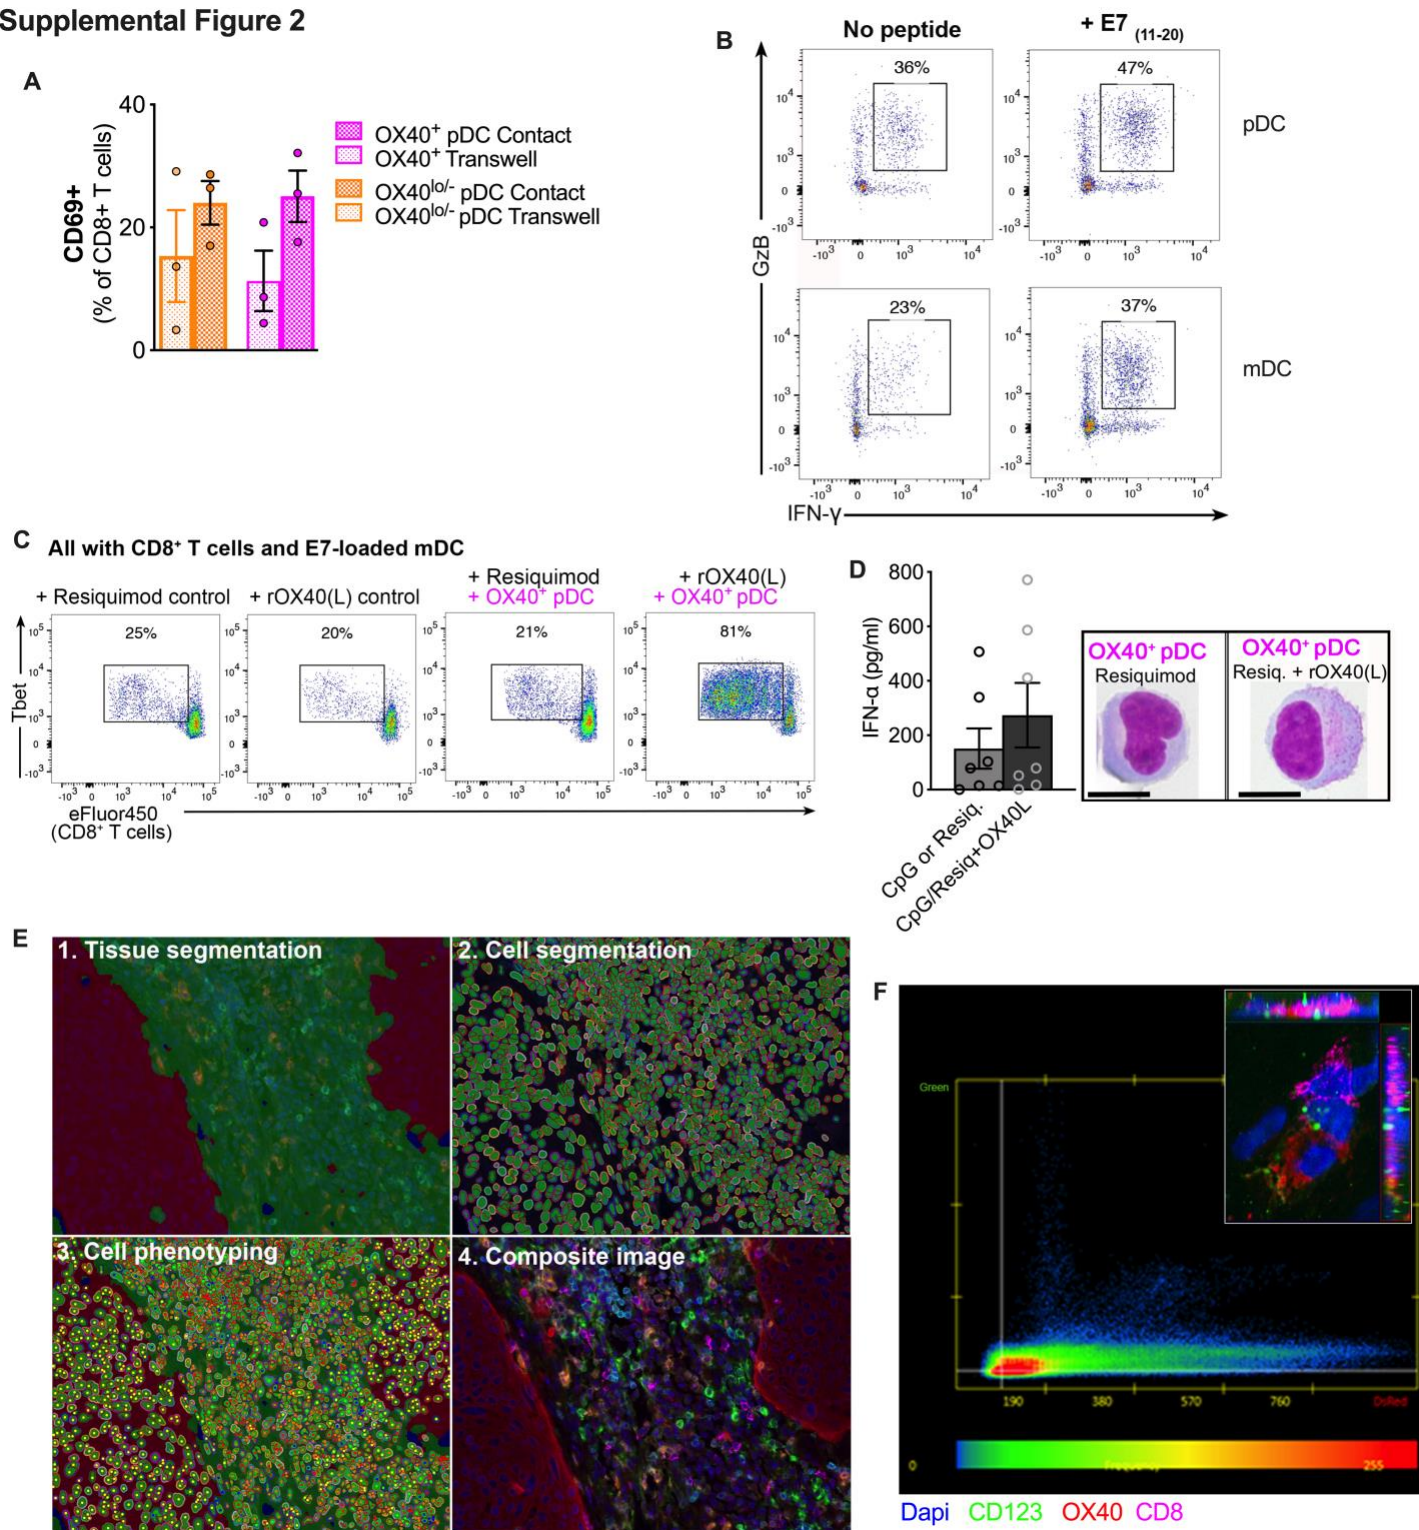

**The effect of OX40-ligation on pDC morphology, IFN- $\alpha$  secretion and immunostimulatory capacity.** (a) Percentage of activated (CD69<sup>+</sup>) CD8<sup>+</sup> T cells in transwell vs. contact co-culture with pDC subsets (n=3). (b) The production of granzyme B (GzB) and IFN- $\gamma$  by E7-specific CD8<sup>+</sup> T cells co-cultured with autologous pDC and mDC without or with prior loading with HPV E7 peptide. (c) Tbet expression on proliferating antigen-specific (eFluor450-low) CD8<sup>+</sup> T cells from autologous co-culture with peptide-loaded monocyte-derived dendritic cells (mDC) and with OX40<sup>+</sup> pDC pre-stimulated with either Resiquimod or rOX40(L). (d) The concentration (pg/ml) of IFN- $\alpha$  in the supernatant from OX40<sup>+</sup> pDC from HNSCC patients (n=7) stimulated with either CpG or Resiquimod or combination treatment of either CpG or Resiquimod with recombinant OX40(L) [rOX40(L)]. Data normalized to  $2 \times 10^3$  pDC per sample. May-Grunwald staining of FACS-sorted OX40<sup>+</sup> pDC from the TME of a patient, stimulated with either Resiquimod alone or Resiquimod with

rOX40(L). n= 3; three experimental repeats. 100× magnification, scale bar, 5 μm. (e) Example of image analysis workflow in inForm 2.1 (Akoya Biosciences) software. Following spectral unmixing, single images were segmented according to tissue type (i.e. tumor and stroma) followed by cell segmentation based on a proprietary inForm active learning phenotyping algorithm. Cells were then phenotyped in inForm into one of three different types according to the markers of interest: tumor cells (panCK<sup>+</sup>), CD8<sup>+</sup> T cells (CD3<sup>+</sup>CD8<sup>+</sup>), pDC (CD3<sup>+</sup>CD123<sup>+</sup>), macrophages (CD68<sup>+</sup>) and 'other cells' (panCK<sup>-</sup>CD68<sup>-</sup>CD8<sup>-</sup>CD123<sup>-</sup>). (f) Colocalization of OX40 (red) with CD123 (green) signals shown as a two-dimensional scatter plot of signal intensities (red on X-axis, green on Y-axis) from a CD123<sup>+</sup> cell adjacent to a CD8<sup>+</sup> cell (inset: three-dimensional x-y-z plot), from the tissue section of the TME from a HNSCC patient. One-way ANOVA followed by Tukey's post hoc test (a) and Two-tailed paired T-test (d). Bar graph data are mean ± s.e.m

### Supplemental Figure 3

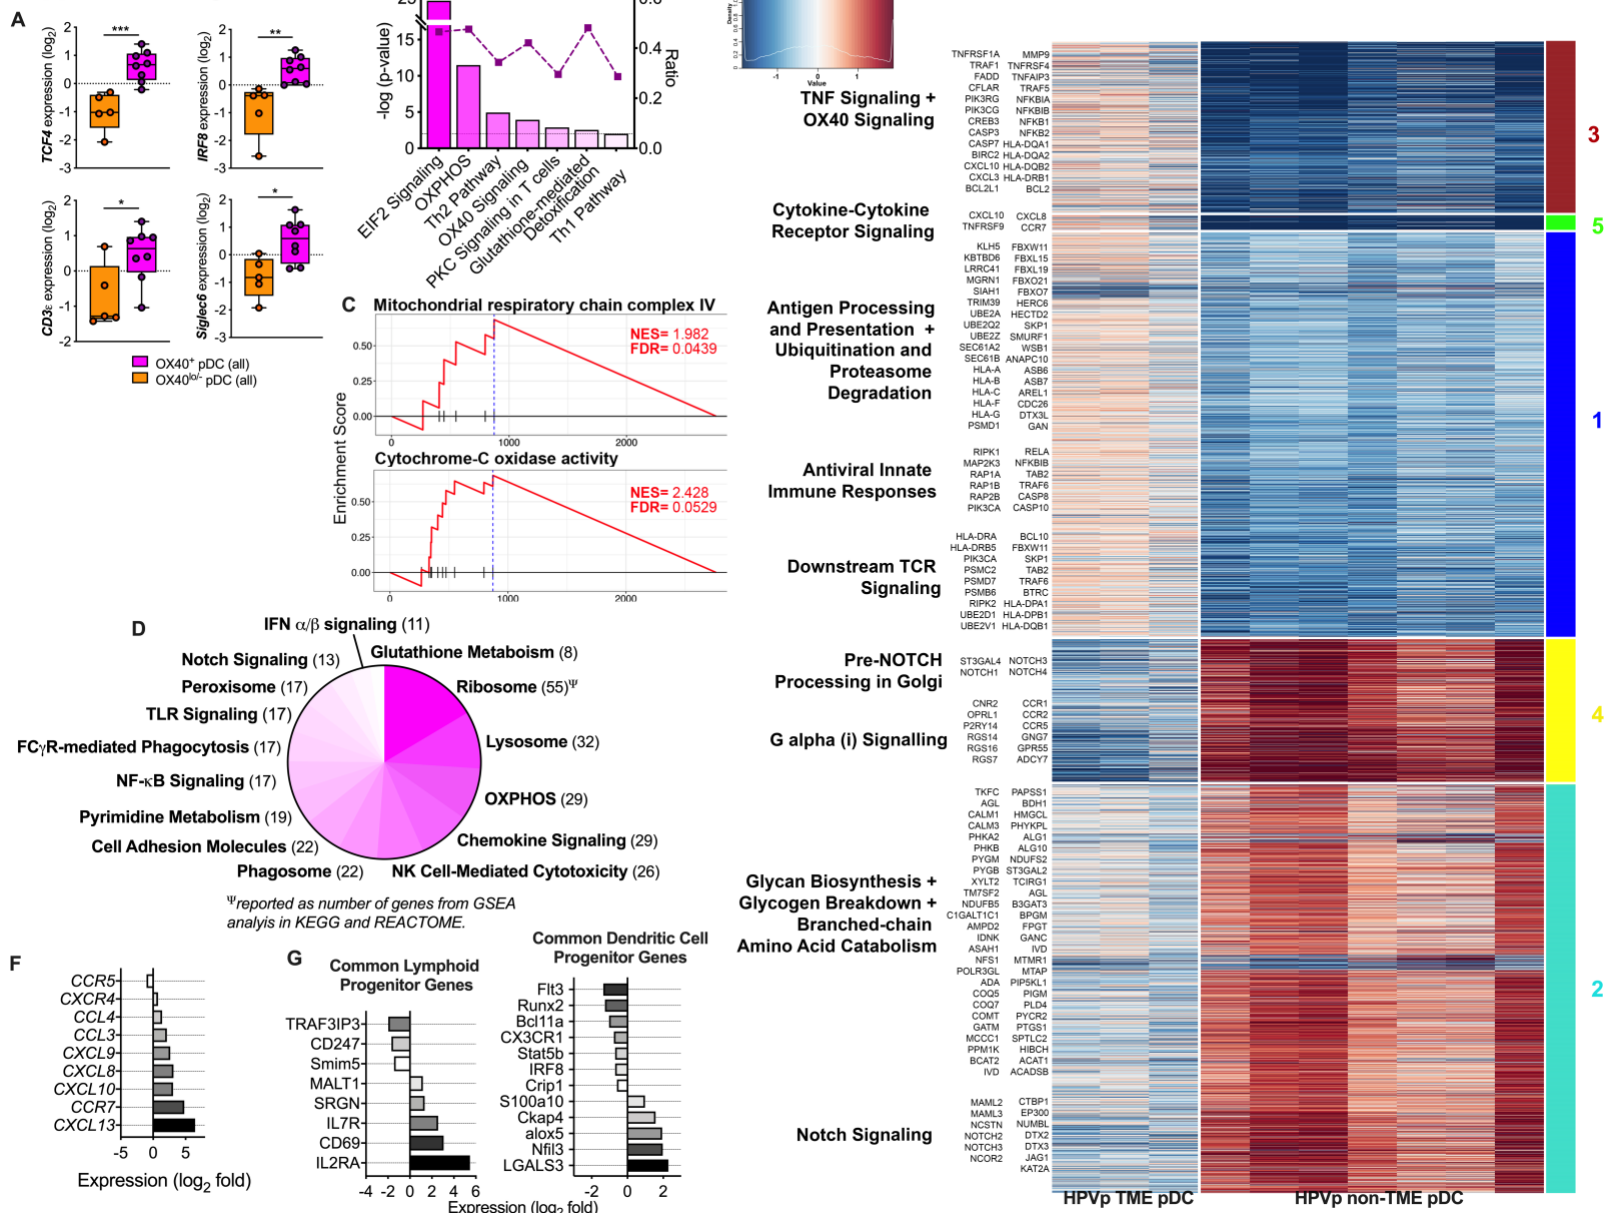

### Transcriptomes of pDC in HNSCC based on TME- and OX40-status.

**a-g:** Bulk RNA sequencing was performed on cell-sorted pDC, including OX40<sup>+</sup> and OX40<sup>lo/-</sup> pDC, from the TME and non-TME in HNSCC patients, including analysis restricted to HPV-positive (HPVp) patients (n= 4). Differentially expressed genes (DEG) were determined using the criterion of fold-changes (FC)  $\geq 1.5$ . **(a)** Expression of *TCF4*, *IRF8*, *CD3e* and *Siglec6* in OX40<sup>+</sup> and OX40<sup>lo/-</sup> pDC from HNSCC patients (n= 7) (**Supplemental Table 2**). **(b)** Ingenuity pathway analysis (IPA)-generated canonical pathway analysis of top enriched pathways ( $-\log(p\text{-value}) > 2.0$ ) in HPVp OX40<sup>+</sup> pDC. **(c)** Gene set enrichment analysis (GSEA) plots of oxidative phosphorylation-related gene pathways enriched in HPVp OX40<sup>+</sup> pDC with normalized enrichment scores (NES) and false discovery rates (FDR). **(d)** Pie chart of the top enriched-pathways ( $p < 0.05$ ) generated by enriched gene set analysis (KEGG and Reactome) of DEG from OX40<sup>+</sup> and OX40<sup>lo/-</sup> pDC from all patients (n= 7). **(e)** Heat map reporting relative expression ( $\log_2$  values) in rows of DEG (**Supplemental Table 4**) in pDC across primary tumors from HPVp patients, labeled as HPVp TME (n= 3) and matched non-TME tissue (dLN<sub>neg</sub>/PBMC, n= 7 including some patient duplicates). Heat map color scheme is based on  $\log_2$  FC expression levels from -2 (blue) to 2 (red). Color bars in right margin highlight five main gene clusters, with their corresponding labels 1-5, according to their gene expression states. Labeling in left margin highlights annotation of clusters with notable pathways (KEGG). **(f)** Expression of chemokine receptor/ligand genes

upregulated in TME pDC from HNSCC patients. (g) Expression of common lymphoid progenitor and common dendritic cell progenitor lineage genes upregulated in TME pDC.

Unpaired Student's T test (a). Middle line of box-and-whisker plot indicates the median, box limits indicate the first and third quartiles, and 'whiskers' indicate 'extreme' for all data points. IPA ratios/Z-scores in Source Data 2.

# OX40+ pDC correlate to survival and slower tumor growth.

## Supplemental Figure 4

### A Mouse pDC gating strategy

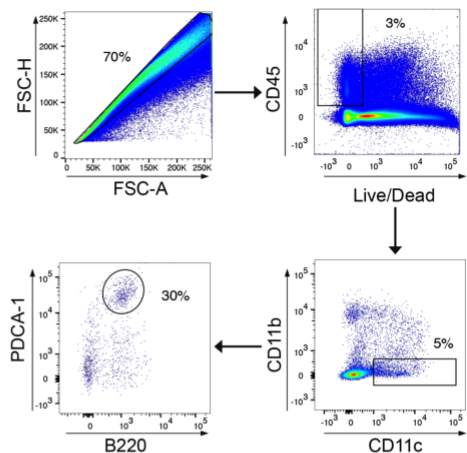

### B B16CCR7 dLN pDC B16F10 dLN pDC mDC (WT) gp100

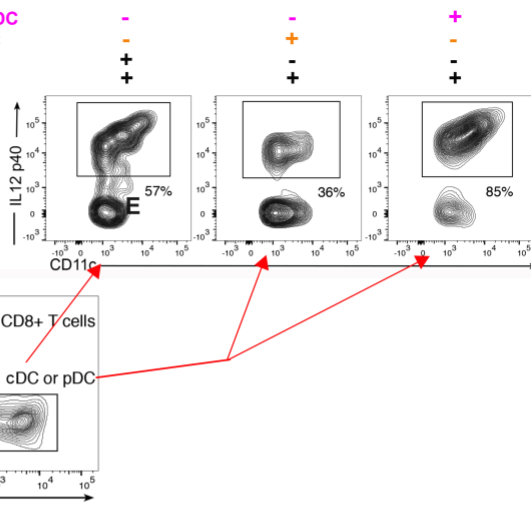

### C All with CD8+ T cell and gp100-loaded

#### B16CCR7 dLN pDC Resiquimod OX86

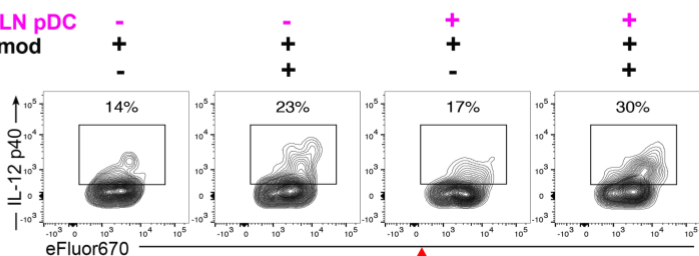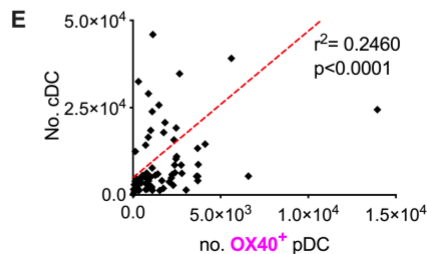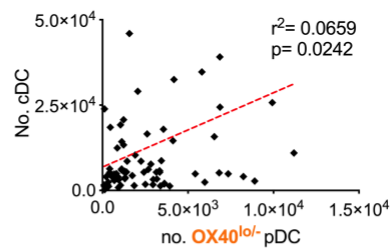

### D

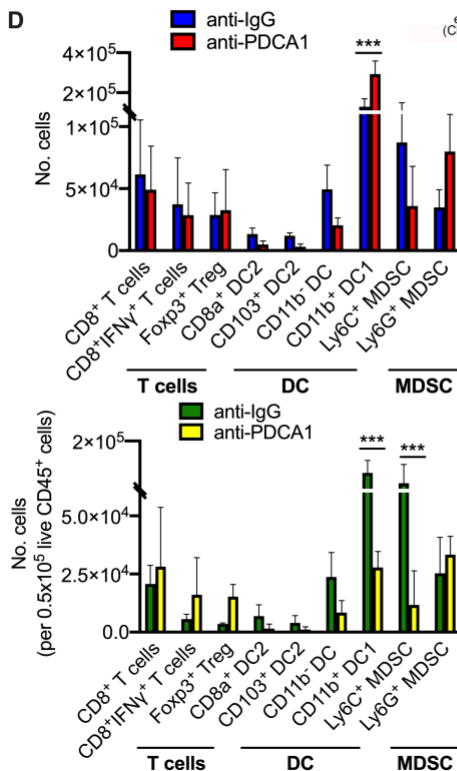

### F Ly6G+ MDSC

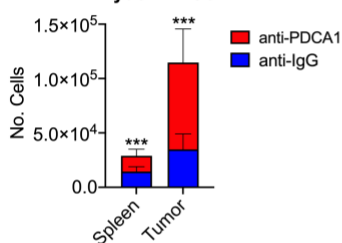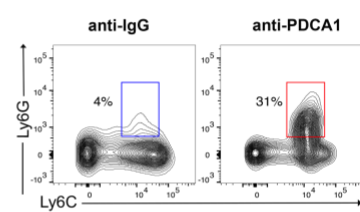

### G B16-CCR7 + anti-IgG

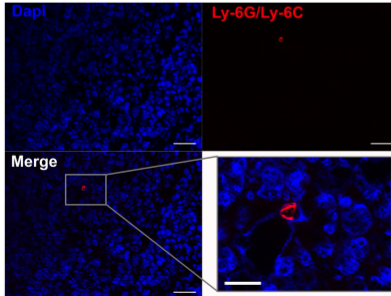

### B16-CCR7 + anti-PDCA1

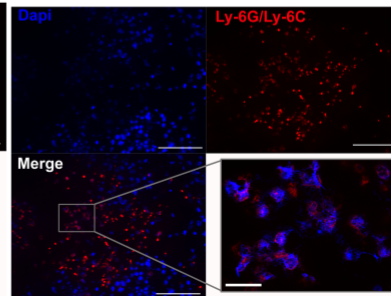

**(a)** Murine tumor pDC gating strategy. Live singlets were first selected using FSC-H and FSC-A and CD45<sup>+</sup> live/dead viability stain. pDC were then gated from CD11<sup>cm</sup>CD11<sup>bneg</sup> cells as PDCA1<sup>+</sup>B220<sup>+</sup>. **(b)** Flow plots of IL-12 p40 production by either cDC (from WT B6 mice) and pDC (from dLN of B16-F10- or B16CCR7-bearing mice) co-cultured with Pmel-1 CD8<sup>+</sup> T cells. n= 2; two experimental repeats. **(c)** Flow plots of IL-12 p40 production by cDC when co-cultured with Pmel-1 CD8<sup>+</sup> T cells and pDC from B16CCR7-bearing mice pre-stimulated with Resiquimod and OX86. **(d)** Number of different immune cell populations in TME of either B16-F10- or B16CCR7-bearing mice treated with either anti-PDCA1 or anti-polyclonal IgG. Data are pooled from individual experiments and normalized to 5×10<sup>5</sup> live cells. **(e)** Correlation (Pearson) of cDC and either OX40<sup>+</sup> or OX40<sup>lo</sup>- pDC numbers (all normalized to 1×10<sup>6</sup> live cells) in the TME of HNSCC patients (n= 77). A line of best fit is shown. **(f)** Quantification of granulocytic myeloid-derived suppressor cells (MDSC) (CD11b<sup>+</sup>Ly6G<sup>+</sup>Ly6C<sup>+</sup>) in the tumor and spleen from B16CCR7-bearing mice treated with either pDC-depleting antibody (anti-PDCA1) or anti-polyclonal IgG (control). Corresponding flow plots show Ly6G<sup>+</sup> (granulocytic) and Ly6C<sup>+</sup> (monocytic) MDSC in pDC-depleted (red gate) and control (blue gate) mice. **(g)** Immunofluorescence microscopy of Ly-6G/Ly-6C MDSC in B16CCR7-bearing mice treated with either anti-polyclonal IgG antibody (control) or anti-PDCA1 pDC depleting antibody. Top (anti-IgG): 10×, scale bar 50 μm and 40×, scale bar 20 μm (inset); Bottom (anti-PDCA1): 20×, scale bar 50 μm and 40×, scale bar 20 μm (inset). Red, Ly-6G/Ly-6C; blue, Dapi. One-way ANOVA followed by Tukey's post hoc test (d, f). Bar graph data are mean ± s.e.m. \*\*\**P* < 0.001.





| Patient | Age/<br>Sex | TNM*<br>Stage | HPV | 1° Site     | 1° Site<br>Collected | LN<br>Collected          | PBMC<br>Collected | Monocyte<br>Expansion† | Flow<br>Cytometric<br>Phenotyping | FACS<br>sort | ELISA/<br>Luminex | Co-<br>culture | RNA<br>-seq | IF | IHC‡ |
|---------|-------------|---------------|-----|-------------|----------------------|--------------------------|-------------------|------------------------|-----------------------------------|--------------|-------------------|----------------|-------------|----|------|
| NMH67   | 66/M        | T4N0          | -   | Larynx      | Y                    | L neck contents          | N                 |                        | ×                                 | ×            |                   | ×              |             |    |      |
| NMH68   | 36/F        | T2N2          | -   | Oral tongue | Y                    | N/A                      | Y                 | ×                      |                                   | ×            | ×                 | ×              |             |    |      |
| NMH69   | 56/M        | T2N0          | -   | Oral tongue | Y                    | N/A                      | Y                 |                        |                                   | ×            |                   | ×              | ×           |    |      |
| NMH70   | 54/M        | T3N1          | -   | Oral tongue | Y                    | R level 2A               | Y                 |                        |                                   | ×            | ×                 | ×              |             | ×  |      |
| NMH71   | 70/M        | T3N2          | -   | BOT         | Y                    | N/A                      | Y                 |                        | ×                                 | ×            | ×                 | ×              |             |    |      |
| NMH72   | 83/F        | T4N0          | -   | FOM         | Y                    | N/A                      | Y                 |                        |                                   | ×            | ×                 |                |             |    |      |
| NMH73   | 56/M        | T2N2          | -   | Oral tongue | Y                    | L level 2                | Y                 |                        | ×                                 | ×            |                   |                |             |    |      |
| NMH74   | 35/F        | T2N0          | -   | Oral tongue | N                    | N/A                      | Y                 |                        |                                   | ×            | ×                 |                |             |    |      |
| NMH75   | 57/M        | T2N0          | -   | FOM         | Y                    | N/A                      | Y                 | ×                      |                                   | ×            |                   | ×              |             |    |      |
| NMH76   | 67/M        | T3N0          | -   | Oral tongue | Y                    | R neck contents          | Y                 | ×                      |                                   | ×            |                   | ×              |             |    |      |
| NMH77   | 56/M        | T4N3          | -   | Larynx      | Y                    | L level 2A<br>L level 3  | Y                 | ×                      | ×                                 | ×            | ×                 | ×              |             |    |      |
| NMH78   | 29/F        | T1N3          | -   | Oral tongue | N                    | R level 2A,3             | Y                 | ×                      |                                   | ×            |                   | ×              |             |    |      |
| NMH79   | 49/F        | T3N1          | -   | Oral tongue | Y                    | L level 4                | N                 |                        | ×                                 | ×            |                   |                |             |    |      |
| NMH80   | 63/M        | T4N0          | -   | Maxilla     | Y                    | N/A                      | Y                 |                        | ×                                 | ×            |                   |                |             |    |      |
| NMH81   | 65/M        | T4N0          | -   | Larynx      | Y                    | R level 4                | Y                 |                        | ×                                 | ×            |                   |                | ×           | ×  |      |
| NMH82   | 50/M        | T3N2          | -   | Oral tongue | Y                    | R level 4                | N                 |                        | ×                                 | ×            |                   |                |             |    |      |
| NMH83   | 58/F        | T2N3          | -   | Oral tongue | N                    | R level 2A,3             | N                 |                        | ×                                 | ×            | ×                 |                |             |    |      |
| NMH84   | 73/M        | T1N1          | -   | FOM         | N                    | L level 1B               | N                 |                        |                                   | ×            | ×                 |                |             |    |      |
| NMH85   | 84/M        | T3N0          | -   | Oral tongue | Y                    | N/A                      | Y                 |                        | ×                                 | ×            |                   |                |             |    |      |
| NMH86   | 60/M        | T4N3          | -   | Oral tongue | N                    | L level 3<br>R level 4   | N                 |                        | ×                                 | ×            |                   |                |             |    |      |
| NMH87   | 57/M        | T4N1          | -   | Hypopharynx | N                    | R level 3,4              | N                 |                        | ×                                 | ×            |                   |                |             |    |      |
| NMH88   | 59/M        | T4N3          | -   | Mandible    | N                    | R level 3<br>L level 3   |                   |                        | ×                                 | ×            | ×                 |                |             |    |      |
| NMH89   | 77/M        | T1N0          | -   | Oral tongue | Y                    | N/A                      | Y                 |                        |                                   | ×            |                   | ×              |             |    |      |
| NMH90   | 72/M        | T1N1          | -   | Mandible    | N                    | R level 1b               |                   |                        | ×                                 | ×            |                   |                |             |    |      |
| NMH91   | 69/M        | T4N0          | -   | Larynx      | Y                    | R level 2                | N                 |                        | ×                                 | ×            |                   |                |             |    |      |
| NMH92   | 77/M        | T1N0          | -   | Oral mucosa | Y                    | N/A                      | Y                 |                        | ×                                 | ×            |                   |                |             |    |      |
| NMH93   | 25/M        | T4N3          | -   | Oral tongue | N                    | L level 2A<br>R level 3  |                   |                        | ×                                 | ×            |                   |                |             |    |      |
| NMH94   | 59/M        | T4N3          | -   | Lip         | N                    | L level 1b<br>R level 1b | Y                 |                        | ×                                 | ×            | ×                 |                |             |    |      |
| NMH95   | 77/M        | T2N0          | -   | Scalp       | N                    | Left neck contents       | N                 |                        | ×                                 |              |                   |                |             |    |      |
| NMH96   | 65/M        | T3N0          | -   | Oral tongue | Y                    | Left neck contents       | N                 |                        | ×                                 | ×            |                   |                |             |    |      |
| NMH97   | 47/M        | T2N2          | -   | BOT         | Y                    | R level 2A,4             | Y                 |                        | ×                                 |              | ×                 |                |             |    |      |
| NMH98   | 78/M        | T1N0          | -   | Mandible    | Y                    | N/A                      | Y                 |                        | ×                                 |              | ×                 |                |             |    |      |
| NMH99   | 58/M        | T3N3          | -   | Larynx      | N                    | N/A                      | Y                 |                        | ×                                 | ×            | ×                 |                |             |    |      |
| NMH100  | 56/M        | T4N2          | -   | Mandible    | N                    | R level 3                | Y                 |                        | ×                                 | ×            | ×                 |                | ×           |    |      |
| NMH101  | 76/M        | T4N2          | -   | Larynx      | N                    | R level 2A,3             | N                 |                        | ×                                 |              |                   |                |             |    |      |
| NMH102  | 62/M        | T3N0          | -   | Larynx      | Y                    | L level 3                | N                 |                        | ×                                 |              |                   |                |             |    |      |

\*Tumor-node-metastasis (TNM) staging according to the AJCC Staging Manual (Eighth edition); †Monocytes obtained from patient pre-operative blood and differentiated into monocyte-derived dendritic cell (mDC) (Methods); ‡Seven-plex immunohistochemistry (IHC) using the Vectra Polaris platform (Akoya Biosciences). §Primary tumor cannot be staged (unknown primary). HPV = Human Papillomavirus; 1° = primary tumor; LN = lymph node; PBMC = peripheral blood mononuclear cells; IF = immunofluorescence; M = male; F = female; BOT = base of tongue; FOM = floor of mouth; R = right; L = left; N/A = not applicable.

**Supplemental Table 2: HNSCC patient RNA-seq pDC samples**

| Sample ID | Pt. ID | HPV | Sample details            | TME-status | OX40-status*     |
|-----------|--------|-----|---------------------------|------------|------------------|
| pDC-1     | NMH19  | +   | dLN <sub>pos</sub>        | TME        | High             |
| pDC-2     |        |     | dLN <sub>neg</sub>        | non-TME    | High             |
| pDC-3     | NMH61  | -   | 1° <sup>†</sup> (gingiva) | TME        | High             |
| pDC-4     |        |     | PBMC                      | non-TME    | High             |
| pDC-5     | NMH69  | -   | 1° (tongue)               | TME        | Low              |
| pDC-6     |        |     | dLN <sub>neg</sub>        | non-TME    | High             |
| pDC-7     |        |     | dLN <sub>neg</sub>        | non-TME    | N/A              |
| pDC-8     | NMH81  | -   | dLN <sub>neg</sub>        | non-TME    | High             |
| pDC-9     |        |     | dLN <sub>neg</sub>        | non-TME    | N/A <sup>‡</sup> |
| pDC-10    | NMH29  | +   | dLN <sub>neg</sub>        | non-TME    | High             |
| pDC-11    |        |     | dLN <sub>neg</sub>        | non-TME    | N/A              |
| pDC-12    |        |     | dLN <sub>pos</sub>        | TME        | Low              |
| pDC-13    | NMH27  | +   | dLN <sub>neg</sub>        | non-TME    | High             |
| pDC-14    |        |     | 1° (tonsil)               | TME        | N/A              |
| pDC-15    |        |     | 1° (tonsil)               | TME        | Low              |
| pDC-16    | NMH31  | +   | dLN <sub>neg</sub>        | non-TME    | N/A              |
| pDC-17    |        |     | dLN <sub>neg</sub>        | non-TME    | Low              |
| pDC-18    |        |     | 1° (tonsil)               | TME        | Low              |
| pDC-19    |        |     | PBMC                      | non-TME    | N/A              |

\*Determined at the time of sorting and based on the gating schemata outlined in Figure S1a; †Primary tumor site; ‡Not-applicable because it represents the whole pDC population and not an OX40 subset. dLN<sub>neg</sub> = draining cervical lymph node, tumor-negative; dLN<sub>pos</sub> = draining cervical lymph node, tumor-positive; PBMC = peripheral blood mononuclear cells; TME = tumor microenvironment.

**Supplemental Table 3: Upregulated differentially expressed genes in OX40+ pDC grouped according to enriched pathways (KEGG). Genes in each category are listed in order of highest expression levels.**

| TNFR2<br>NF-κB<br>pathway* | I.<br>Ribosome/<br>EIF2 Signaling | II.<br>Oxidative<br>Phosphorylation | III.<br>Detoxification of<br>ROS <sup>†</sup> | IV.<br>Lysosome | Phagosome   | V.<br>FcγR-mediated<br>Phagocytosis | VI.<br>Type I IFN<br>Signaling | TLR <sup>‡</sup><br>Pathway | VII.<br>NK Cell Mediated<br>Cytotoxicity |
|----------------------------|-----------------------------------|-------------------------------------|-----------------------------------------------|-----------------|-------------|-------------------------------------|--------------------------------|-----------------------------|------------------------------------------|
| LTBR                       | RPS6KA4 RPS15A                    | NDUFB3 ATP5I                        | ABCD1 IDH2                                    | AP1M1 PSAP      | ACTB ACTG1  | LYN PLCG2                           | NUP93 USP18                    | TOLLIP                      | ITGAL TYROBP                             |
| LTB                        | MRPL41 RPL38                      | ATP5E COX17                         | PRDX5 HSD17B4                                 | AP1S1 NAPSA     | RILP CORO1A | PIK3CD MAPK3                        | PIN1 NLRC5                     | LY96                        | ITGB2 PTPN6                              |
| PSME1                      | RPL19 MRPL11                      | NDUFB7 ATP5H                        | MPV17 ACSL5                                   | ARSB CTSW       | NCF2 CD36   | ARPC4 INPP5D                        | UBE2E1 OAS1                    | IRAK1                       | CD48 NCR2                                |
| PSMB10                     | RPL15 RPS25                       | CYC1 TCIRG1                         | CRAT CYBA                                     | LGMM DNASE2     | NCF1 TAP2   | PLPP1 SYK                           | UBE2L6 BST2                    | MAPK9                       | PTK2B HCST                               |
| PSMB8                      | RPS3 RPL30                        | COX7C NDUFA4                        | PMVK GSTP1                                    | PPT1 GNS        | NCF4 SCARB1 | PRKCD VAMP8                         | UBA7 IFI35                     | MAP2K6                      | PPP3CB FYN                               |
| PSMB9                      | MRPL36 RPS27                      | ATP5G2 ATP5J2                       | ACOX3 GPX7                                    | ASAH1 NPC1      |             | ARPC1B NIPSNAP1                     |                                | TAB1                        | FCER1G SH3BP2                            |
| TNFSF12                    | RPLP1 RPS28                       | COX7A2L NDUFA3                      | GSTK1 TXN2                                    | TPP1 NPC2       |             | RAC2 TRAP1                          |                                | IRF5                        | NFATC2 LCP2                              |
| TNFSF13B                   | RPS14 RPL32                       | ATP5G1 COX8A                        | CAT GSS                                       | AP1S2 ARSA      |             | GSN FLOT1                           |                                |                             | SELL                                     |
| DRAP1                      | RPL11 RPL7                        | COX5B NDUFA1                        | MGST2                                         | NAGA SUMF1      |             |                                     |                                |                             |                                          |
|                            | RPL12 RPS29                       | NDUFB1 NDUFV1                       |                                               | MAN2B1 CTSH     |             |                                     |                                |                             |                                          |
|                            | RPS27A RPL9                       | NDUFB2 ATP5C1                       |                                               | AGA GGA2        |             |                                     |                                |                             |                                          |
|                            | MRPL4 RPL8                        | NDUFS6 IDH3G                        |                                               |                 |             |                                     |                                |                             |                                          |
|                            | RPS18 RPL10A                      | NDUFS4 IDH3A                        |                                               |                 |             |                                     |                                |                             |                                          |
|                            | MRPS9 RPS21                       | NDUFS8 ECH1                         |                                               |                 |             |                                     |                                |                             |                                          |
|                            | RPS15 RPS23                       | COX6B1 MDH2                         |                                               |                 |             |                                     |                                |                             |                                          |
|                            | RPS4Y1 RPS24                      |                                     |                                               |                 |             |                                     |                                |                             |                                          |
|                            | RPS11 RPL27                       |                                     |                                               |                 |             |                                     |                                |                             |                                          |
|                            | UBA52 MRPS21                      |                                     |                                               |                 |             |                                     |                                |                             |                                          |
|                            | RPL35 RPS8                        |                                     |                                               |                 |             |                                     |                                |                             |                                          |
|                            | RPL36 RPS7                        |                                     |                                               |                 |             |                                     |                                |                             |                                          |
|                            | RPL37 RPL29                       |                                     |                                               |                 |             |                                     |                                |                             |                                          |
|                            | RPL27A MRPL24                     |                                     |                                               |                 |             |                                     |                                |                             |                                          |
|                            | MRPL23 RPL23                      |                                     |                                               |                 |             |                                     |                                |                             |                                          |
|                            | RPL21                             |                                     |                                               |                 |             |                                     |                                |                             |                                          |

\*TNFR2 non-canonical NF-κB pathway/TNFSF members mediating non-canonical NF-κB pathway; †Detoxification of ROS/Peroxisome/Glutathione metabolism; ‡TLR signaling pathway. ROS = reactive oxygen species; IFN = interferon; TLR = Toll-like receptor; NK = natural killer.

**Supplemental Table 4: 4,197 differentially-expressed genes (2,181 upregulated, 2,016 downregulated) for HPV non-TME compared to TME pDC, mapped as Clusters 1-5.**

| CLUSTER 1 |                         |              |                        |          |                        |          |                        |           |                        |          |                        |          |                        |
|-----------|-------------------------|--------------|------------------------|----------|------------------------|----------|------------------------|-----------|------------------------|----------|------------------------|----------|------------------------|
| DEG       | FC (log <sub>2</sub> )* | DEG          | FC (log <sub>2</sub> ) | DEG      | FC (log <sub>2</sub> ) | DEG      | FC (log <sub>2</sub> ) | DEG       | FC (log <sub>2</sub> ) | DEG      | FC (log <sub>2</sub> ) | DEG      | FC (log <sub>2</sub> ) |
| LRP5L     | -1.07097                | CASKIN2      | -0.9989                | PLEKHD1  | -0.9368                | FAM129A  | -0.8956                | DSTN      | -0.84393               | TOR1AIP2 | -0.7996                | KCTD17   | -0.76603               |
| FAM214B   | -1.06955                | FAS          | -0.9984                | JUP      | -0.9367                | VPS33B   | -0.894                 | TOP1      | -0.84354               | DDAH2    | -0.7991                | ZFYVE1   | -0.76577               |
| ABCF3     | -1.06796                | VCPKMT       | -0.9981                | PTRH2    | -0.9362                | PTBP2    | -0.8932                | YY1AP1    | -0.84299               | UBR7     | -0.7991                | ZNF354A  | -0.76527               |
| PNPLA8    | -1.06745                | PTTG1        | -0.9973                | FAM177A1 | -0.9357                | SLC9A8   | -0.8919                | HN1       | -0.84296               | C10orf10 | -0.7973                | ERMN     | -0.7651                |
| TK1       | -1.06561                | RIMKLB       | -0.9958                | NDUFS5   | -0.9356                | ZNF8     | -0.8912                | ATP6V1F   | -0.84205               | MMAA     | -0.7972                | ZNF649   | -0.76507               |
| SESTD1    | -1.06531                | ADCY3        | -0.9956                | ZSCAN26  | -0.9356                | FGFR1OP  | -0.8905                | RAB29     | -0.83944               | FAM45A   | -0.797                 | PNRC2    | -0.76464               |
| TMEM57    | -1.06494                | PHF1         | -0.9939                | TRPM4    | -0.9356                | SLC7A1   | -0.8905                | FRG1      | -0.83784               | ZNF195   | -0.797                 | TRAF6    | -0.7642                |
| AMZ1      | -1.0643                 | WARS         | -0.9924                | CSNK1A1  | -0.9351                | ITPKC    | -0.8873                | NPH4      | -0.83742               | CANT1    | -0.7961                | FTL      | -0.76333               |
| FAM118A   | -1.06408                | FRMD8        | -0.9922                | ILF2     | -0.9344                | INPP1    | -0.8871                | TERF1     | -0.83706               | RPS6KB1  | -0.7957                | GTPBP4   | -0.76331               |
| SDCBP     | -1.05937                | BAG2         | -0.992                 | HARS2    | -0.9341                | USP11    | -0.8869                | MRPL50    | -0.83698               | KLF5     | -0.7947                | PDIK1L   | -0.76323               |
| TVP23A    | -1.05906                | ZNF687       | -0.9891                | STAB1    | -0.9334                | PDCL3    | -0.8869                | MPHOSPH10 | -0.83669               | AXIN1    | -0.7946                | FBRS     | -0.76189               |
| TCAF2     | -1.05766                | RNF10        | -0.9876                | MAN1A1   | -0.9328                | CYTH2    | -0.8869                | RPP38     | -0.83623               | CDC42BPB | -0.7941                | SSSCA1   | -0.76168               |
| SOCS5     | -1.05662                | TRAPPC4      | -0.987                 | TMEM188  | -0.9318                | MBIP     | -0.8866                | HGSNAT    | -0.83539               | MRPL13   | -0.7939                | FAM131A  | -0.76114               |
| SLC35F6   | -1.05575                | PEX14        | -0.9868                | PNMA1    | -0.9311                | LLGL2    | -0.885                 | ZNF100    | -0.83531               | GRAMD4   | -0.7938                | ZNF836   | -0.76107               |
| ANXA2     | -1.05333                | GPKOW        | -0.9866                | HGS      | -0.9308                | ENY2     | -0.8846                | THBS1     | -0.83471               | SYVN1    | -0.7935                | HBP1     | -0.76097               |
| TNFAIP8   | -1.05168                | ZUFSP        | -0.9863                | EGFL8    | -0.9301                | ARSG     | -0.8844                | ZNF555    | -0.83412               | C11orf84 | -0.7934                | RNF24    | -0.75978               |
| SWAP70    | -1.05158                | SLC1A3       | -0.9863                | ALCAM    | -0.9299                | PISD     | -0.8833                | MTF2      | -0.8331                | TYW5     | -0.793                 | TMF1     | -0.75978               |
| ZNF675    | -1.05147                | SIK3         | -0.9846                | LGALS1   | -0.9292                | BCL10    | -0.8831                | USP31     | -0.83307               | MICALL2  | -0.7914                | DNAJA2   | -0.75882               |
| TDG       | -1.04968                | PILRB        | -0.9844                | RAB34    | -0.9287                | MAP1S    | -0.8803                | ZSCAN12   | -0.83247               | HS3ST1   | -0.7906                | EIF6     | -0.75877               |
| ZER1      | -1.0489                 | PHLDB3       | -0.9833                | ALDH1L2  | -0.9284                | SLAMF7   | -0.8795                | LDOC1L    | -0.83244               | CARD19   | -0.7901                | UBE2Z    | -0.7584                |
| MAPK6     | -1.04613                | SLFN5        | -0.9828                | CNG1     | -0.9272                | MED8     | -0.8794                | LRRC41    | -0.83232               | HERPUD1  | -0.7894                | ZNF436   | -0.758                 |
| DGCR14    | -1.04527                | CLIP4        | -0.9816                | WIPI1    | -0.9247                | ING2     | -0.879                 | UPP1      | -0.83158               | IRF2BP1  | -0.7863                | CGRRF1   | -0.75789               |
| PUS3      | -1.04434                | LRRC8C       | -0.9805                | EIF5A2   | -0.9237                | SEC61B   | -0.8789                | BASP1     | -0.83157               | PPP1CB   | -0.7863                | CCNC     | -0.75687               |
| MTMR6     | -1.04401                | MOB1B        | -0.9802                | C1orf216 | -0.9232                | TUBA1A   | -0.8784                | SSH1      | -0.83153               | DYNC1L1  | -0.7863                | RPL22L1  | -0.75652               |
| STX3      | -1.04399                | FAM107B      | -0.9791                | ZNF879   | -0.9232                | ZNF681   | -0.8784                | ARL6IP1   | -0.83145               | NBPF19   | -0.7859                | DDX24    | -0.75618               |
| ANKLE2    | -1.04332                | C1orf56      | -0.9789                | ZNF211   | -0.922                 | CD82     | -0.8764                | MFSD5     | -0.82864               | TICAM1   | -0.7853                | BMP8B    | -0.75469               |
| ANKRD28   | -1.04317                | ITGAE        | -0.9771                | CDK14    | -0.9215                | TFEC     | -0.8757                | IPPK      | -0.82737               | NRP1     | -0.7853                | NPIPA5   | -0.75457               |
| ZNF773    | -1.04315                | TIMM22       | -0.9754                | METTL22  | -0.9194                | ELOF1    | -0.8744                | MFSD2A    | -0.82711               | PPP4R2   | -0.7847                | CNNND1   | -0.75456               |
| ZC3H7A    | -1.04275                | TBC1D17      | -0.9753                | EXO5     | -0.9174                | PGBD1    | -0.8738                | CIITA     | -0.8268                | RNF2     | -0.7846                | CWC15    | -0.75363               |
| SEC24A    | -1.04216                | C1orf50      | -0.9748                | CTNNA1   | -0.9174                | ASAP1    | -0.8722                | RDX       | -0.8266                | AMER1    | -0.7833                | SART3    | -0.75357               |
| ACTN1     | -1.04194                | SPAG5        | -0.9745                | VCP      | -0.9173                | ZNF155   | -0.8697                | RAB3IP    | -0.82639               | DUSP12   | -0.7826                | NDUFA11  | -0.75275               |
| CHMP4B    | -1.04117                | ZFP1         | -0.9743                | CLIP2    | -0.9165                | CFAP45   | -0.8695                | YES1      | -0.8262                | INTS5    | -0.7826                | TPD52L2  | -0.7523                |
| BACH2     | -1.03981                | FGD6         | -0.9742                | CORO1C   | -0.9157                | SMCHD1   | -0.8692                | ENO2      | -0.82573               | TMEM41B  | -0.7817                | RNF121   | -0.751                 |
| GIN54     | -1.03966                | ZNF639       | -0.9726                | FAM108C1 | -0.9156                | SCOC     | -0.8682                | PQBP1     | -0.82559               | ZNF260   | -0.7814                | GNA15    | -0.74986               |
| NAA50     | -1.03962                | MAP3K11      | -0.9716                | GPX4     | -0.9151                | TAF1D    | -0.8672                | MYO1D     | -0.82527               | CYSTM1   | -0.7811                | PALB2    | -0.74979               |
| EDEM1     | -1.03769                | CCPG1        | -0.9689                | SLC9B2   | -0.9145                | SLC16A3  | -0.8652                | HAT1      | -0.82526               | SSBP2    | -0.7794                | GOLPH3L  | -0.74968               |
| CCNB1     | -1.03712                | C2orf88      | -0.9664                | ADAP2    | -0.9144                | TMEM136  | -0.8649                | SLC36A4   | -0.82448               | TAB2     | -0.7788                | EIF5B    | -0.74961               |
| WEE1      | -1.03515                | INF2         | -0.9656                | POMGNT2  | -0.9135                | MTMR9    | -0.8646                | MANF      | -0.82446               | MRFAP1   | -0.7777                | TTC33    | -0.7491                |
| SAMD12    | -1.0338                 | PAM          | -0.9633                | MED17    | -0.913                 | CCP110   | -0.8641                | ZFP36L1   | -0.82418               | PHYH     | -0.777                 | BAZ1A    | -0.74828               |
| CCDC71L   | -1.03214                | SFXN3        | -0.9617                | GRAMD1B  | -0.9129                | SLC15A4  | -0.8637                | WHAMM     | -0.82233               | ZC3H12A  | -0.7768                | INSIG1   | -0.74767               |
| SLC39A8   | -1.03078                | CASP2        | -0.9611                | UBA5     | -0.9124                | IRGQ     | -0.8634                | RPS27L    | -0.8223                | PDE7A    | -0.7767                | HLA-DRA  | -0.74741               |
| TMEM189   | -1.02979                | G3BP2        | -0.9605                | LAPTM4A  | -0.9122                | MCM7     | -0.8634                | NUP58     | -0.82126               | TMEM60   | -0.7767                | ADPRHL2  | -0.74733               |
| ZNFX1     | -1.02911                | KDM5B        | -0.9604                | RACGAP1  | -0.9121                | STXBP3   | -0.8632                | VPS37C    | -0.82044               | MIER2    | -0.7759                | MTERF3   | -0.74662               |
| ZNF35     | -1.02768                | HOMER2       | -0.9601                | HMGXB4   | -0.9117                | PRKAR2B  | -0.8631                | BUD13     | -0.81843               | SRRT     | -0.7755                | ZNF581   | -0.74592               |
| CD180     | -1.02729                | ORC6         | -0.9575                | MED31    | -0.9103                | C18orf21 | -0.8625                | TGIF2     | -0.81828               | SOCS6    | -0.7749                | TAF5L    | -0.74547               |
| MPC2      | -1.02679                | RHOH         | -0.9566                | SUOX     | -0.9093                | GNG5     | -0.8624                | S100A10   | -0.81792               | DOLK     | -0.7746                | SMARCE1  | -0.74524               |
| LYST      | -1.0253                 | ACVR2B       | -0.9551                | PRKCI    | -0.9091                | PIK3CA   | -0.8621                | UBXN1     | -0.81677               | ASL      | -0.774                 | PAK1     | -0.74472               |
| THAP3     | -1.02483                | RPS6KC1      | -0.9534                | CEBPD    | -0.9085                | BAK1     | -0.8614                | HLA-A     | -0.81667               | GALNT2   | -0.7733                | LNX2     | -0.74386               |
| PHAX      | -1.02458                | BACH1        | -0.9531                | SLC3A2   | -0.9079                | RGS12    | -0.8601                | TMED7     | -0.8157                | SOAT1    | -0.7729                | GAN      | -0.74357               |
| ATAT1     | -1.02192                | LGALS9       | -0.9516                | ZNF17    | -0.9069                | TNFAIP1  | -0.8599                | KIF7      | -0.81123               | N4BP1    | -0.7722                | SMG8     | -0.74256               |
| USP12     | -1.01825                | NOP58        | -0.9513                | GCNA     | -0.906                 | DFNB31   | -0.8598                | HECTD2    | -0.8112                | CASZ1    | -0.772                 | HOXB2    | -0.74181               |
| HIST1H1C  | -1.0148                 | DAPP1        | -0.9503                | ZNF189   | -0.9043                | RCC2     | -0.8593                | LRRC8A    | -0.81115               | ZSWIM1   | -0.7715                | KRT5     | -0.74121               |
| CASP10    | -1.01469                | SPAG4        | -0.9495                | MORF4L2  | -0.904                 | DNAJC12  | -0.8589                | ACP6      | -0.81075               | NAP1L3   | -0.7713                | ZFP3     | -0.74114               |
| STARD3NL  | -1.01393                | TMEM176B     | -0.9494                | CYB561   | -0.9036                | RAP1A    | -0.8586                | SESN2     | -0.81032               | LMLN     | -0.7703                | CHSY1    | -0.74088               |
| COMMD5    | -1.01344                | HIST2H2AC    | -0.9481                | GNLY     | -0.9031                | KBTBD6   | -0.8579                | NDUFA6    | -0.80923               | FOXP1    | -0.7702                | PDCD10   | -0.74058               |
| HPS6      | -1.01324                | PDGFB        | -0.9473                | RRAS2    | -0.9031                | TCTN3    | -0.8572                | PSMC6     | -0.80843               | MCMBP    | -0.7701                | PPP1R8   | -0.7402                |
| HOMER2    | -1.01323                | MSN          | -0.9464                | SMC4     | -0.9027                | NUP62    | -0.8568                | ZNF229    | -0.80738               | TBC1D23  | -0.7698                | EED      | -0.73986               |
| ARF6      | -1.01221                | PATL1        | -0.9461                | DOCK4    | -0.9021                | PSMA2    | -0.8559                | FDX1      | -0.80556               | DNAH17   | -0.7695                | OTUD5    | -0.73953               |
| MAP4K3    | -1.01172                | RASGRP3      | -0.946                 | CNOT6L   | -0.902                 | WSB1     | -0.8556                | AKAP6     | -0.80489               | LIN7B    | -0.7695                | SIAH1    | -0.73932               |
| LUC7L     | -1.01159                | HLA-F        | -0.9452                | RNF145   | -0.9017                | TRAPPC2B | -0.8549                | CDC37     | -0.80466               | RC3H1    | -0.7694                | ZSCAN22  | -0.73916               |
| AK6       | -1.01144                | CTD-3088G3.8 | -0.9446                | C2orf47  | -0.901                 | LIMS1    | -0.8543                | YWHAH     | -0.80431               | STAG3    | -0.7692                | MRPL14   | -0.7382                |
| SPAG9     | -1.01062                | FAM102B      | -0.9446                | HMCES    | -0.9004                | ZFYVE16  | -0.8542                | TVP23C    | -0.80404               | CCDC120  | -0.769                 | FBN1     | -0.73792               |
| ELOA      | -1.01051                | YDJC         | -0.9445                | DYNLT3   | -0.9004                | MAPK8    | -0.8529                | CTNNB1    | -0.80394               | WDR48    | -0.7681                | UBQLN4   | -0.73781               |
| PI4K2A    | -1.00882                | GSKIP        | -0.944                 | SIDT1    | -0.9                   | FTH1     | -0.8509                | ACTR1B    | -0.80308               | PPP1R3D  | -0.768                 | DDX52    | -0.73711               |
| HBS1L     | -1.00666                | SMAP2        | -0.9422                | CRY2     | -0.8996                | TOR3A    | -0.8505                | GEN1      | -0.80304               | RPAIN    | -0.7678                | KIAA1841 | -0.73639               |
| INPP5F    | -1.00637                | DENND5A      | -0.9405                | SGTB     | -0.8995                | STRIP1   | -0.8505                | CEP89     | -0.8028                | RFFL     | -0.7678                | SEC61A2  | -0.73552               |
| ZNF48     | -1.00518                | TRO          | -0.9402                | BTG3     | -0.8991                | ZNF281   | -0.8495                | MFAP1     | -0.80265               | MRPL15   | -0.7672                | RUNX3    | -0.73416               |
| IFT57     | -1.0002                 | ATAD3B       | -0.9377                | ZNF672   | -0.8989                | PSMD11   | -0.8469                | PAK4      | -0.80192               | KIF20B   | -0.7672                | SAV1     | -0.73402               |
| GPBP1     | -0.99984                | NOCT         | -0.9374                | ACTR1A   | -0.8989                | ENTPD7   | -0.8469                | PPTC7     | -0.80178               | ZBTB34   | -0.767                 | ARPP19   | -0.73242               |
| CORO7     | -0.99957                | RAB12        | -0.9372                | CCNJ     | -0.8976                | CCDC126  | -0.8464                | SEL1L     | -0.80121               | NLRP3    | -0.767                 | SLC10A3  | -0.73154               |
| FXYD2     | -0.99929                | TSPYL1       | -0.9368                | FLNA     | -0.8957                | EI24     | -0.8445                | SEC24D    | -0.80071               | ANKRD50  | -0.7661                | ZNF283   | -0.73125               |

| CLUSTER 1 |                        |          |                        |               |                        |          |                        |          |                        |               |                        |          |                        |
|-----------|------------------------|----------|------------------------|---------------|------------------------|----------|------------------------|----------|------------------------|---------------|------------------------|----------|------------------------|
| DEG       | FC (log <sub>2</sub> ) | DEG      | FC (log <sub>2</sub> ) | DEG           | FC (log <sub>2</sub> ) | DEG      | FC (log <sub>2</sub> ) | DEG      | FC (log <sub>2</sub> ) | DEG           | FC (log <sub>2</sub> ) | DEG      | FC (log <sub>2</sub> ) |
| PKM       | -0.72903               | TMEM199  | -0.695                 | ZNF823        | -0.6594                | TUBE1    | -0.6251                | WDR73    | -0.59935               | VDAC3         | -0.5732                | SEC13    | -0.54787               |
| ZNF543    | -0.72893               | GLTP     | -0.6944                | FH            | -0.6593                | ATP6V0D1 | -0.6249                | MAML1    | -0.59861               | ZBTB45        | -0.5725                | PSMD5    | -0.54781               |
| ENSA      | -0.72811               | ABL1     | -0.6943                | EIF2S2        | -0.6592                | TMEM127  | -0.6248                | KHDRBS1  | -0.59837               | NOB1          | -0.5725                | LAG3     | -0.54779               |
| ZNF562    | -0.72782               | CMC2     | -0.6935                | ZNF749        | -0.6574                | COPS2    | -0.6247                | RBMXL1   | -0.5981                | CCDC127       | -0.5718                | HSF2     | -0.54755               |
| ZBTB5     | -0.7276                | GK       | -0.693                 | CINP          | -0.6568                | MORF4L1  | -0.6246                | UBQLN2   | -0.59787               | GOLT1B        | -0.5713                | OAZ2     | -0.54755               |
| PRNP      | -0.72734               | ZNF430   | -0.6924                | MYH9          | -0.6563                | VAV2     | -0.6245                | FZD2     | -0.59744               | AGPAT6        | -0.5713                | ZC4H2    | -0.54714               |
| SERINC2   | -0.72706               | MAP1LC3A | -0.692                 | TXNDC17       | -0.6562                | TSEN54   | -0.6241                | SLC25A19 | -0.5973                | CTD-2568A17.1 | -0.5706                | ENDOG    | -0.54692               |
| FAM110A   | -0.72696               | HNRNPUL1 | -0.6912                | SPRYD4        | -0.6552                | MGRN1    | -0.6235                | CDC42    | -0.59728               | PSMD6         | -0.5698                | ARFIP2   | -0.54687               |
| ZC3HC1    | -0.72644               | PDK1     | -0.6896                | CXorf40B      | -0.6552                | MIEF1    | -0.6231                | KIAA1191 | -0.59703               | TMUB1         | -0.5697                | FAM234A  | -0.54674               |
| EBLN2     | -0.72534               | IST1     | -0.6894                | POP7          | -0.6546                | POLR1C   | -0.6217                | POC1B    | -0.59699               | KLF3          | -0.5694                | UTP3     | -0.54669               |
| ZBTB49    | -0.72505               | CYLD     | -0.6881                | WDFY1         | -0.6545                | CA5B     | -0.6216                | NECAP2   | -0.59664               | CMTM4         | -0.568                 | WIPI2    | -0.54649               |
| COPRS     | -0.72455               | OXSRI    | -0.6873                | RNF114        | -0.6534                | STX4     | -0.621                 | QSOX1    | -0.59649               | AEBP2         | -0.5676                | SS18L2   | -0.54635               |
| SDHAF2    | -0.72452               | HLA-DRB5 | -0.6872                | TBC1D25       | -0.6532                | ZNF674   | -0.6201                | ZNF552   | -0.59622               | IMMT          | -0.5674                | KAT2B    | -0.54605               |
| NANS      | -0.7242                | TEC      | -0.6869                | GORAB         | -0.6525                | PSMD4    | -0.6197                | MPST     | -0.59609               | ZEB2          | -0.567                 | MPV17L2  | -0.54552               |
| CENPP     | -0.72294               | YTHDF3   | -0.6866                | CD86          | -0.6518                | CCM2     | -0.6195                | RNF25    | -0.59571               | SMARCD1       | -0.5663                | C17orf49 | -0.54521               |
| ALDH8A1   | -0.7222                | LRRC40   | -0.6861                | ZNF550        | -0.6517                | NCOA5    | -0.6192                | MSTO1    | -0.59479               | POP1          | -0.5658                | PGRMC2   | -0.54517               |
| GALE      | -0.72137               | MYOM2    | -0.6854                | PITPNM1       | -0.6512                | PI4K2B   | -0.6191                | ATG4B    | -0.59343               | TP53BP2       | -0.5658                | DNAJC25  | -0.545                 |
| ISCA1     | -0.72122               | DYNC1I2  | -0.6853                | MAP2K3        | -0.6511                | ATP2A2   | -0.6185                | GEMIN2   | -0.59335               | HMGXB3        | -0.5657                | DDX39A   | -0.54499               |
| MCOLN2    | -0.72026               | ZNF451   | -0.684                 | ENTPD1        | -0.65                  | HLA-DQB1 | -0.6176                | INO80D   | -0.59335               | FAM189B       | -0.5653                | RAB22A   | -0.54454               |
| PCGF5     | -0.71964               | SAMD4B   | -0.6828                | FICD          | -0.6491                | CEP76    | -0.6171                | PLAG1    | -0.59334               | BET1L         | -0.5652                | CEP57    | -0.54426               |
| MRPL44    | -0.71964               | MFN1     | -0.6817                | DOT1L         | -0.649                 | ZNF136   | -0.6169                | TIPRL    | -0.59314               | RELA          | -0.5651                | PML      | -0.54411               |
| FAM92A1   | -0.71603               | STAU1    | -0.681                 | FBXO33        | -0.649                 | WDR25    | -0.6168                | MTFR1    | -0.59292               | NET1          | -0.565                 | OCLR     | -0.54389               |
| TRIP6     | -0.71556               | MPRIIP   | -0.6804                | ASNSD1        | -0.6483                | SLC30A7  | -0.6165                | B3GNT2   | -0.5929                | BAG5          | -0.5646                | PDXK     | -0.5438                |
| HLA-G     | -0.71474               | USP42    | -0.6799                | TUBB          | -0.6473                | CLTA     | -0.6165                | SETD9    | -0.59268               | CNOT2         | -0.5644                | FAM615   | -0.54348               |
| E2F6      | -0.7147                | ZNF606   | -0.6794                | SLC17A5       | -0.647                 | RANBP10  | -0.6165                | TBC1D15  | -0.59199               | SERAC1        | -0.5646                | PTPN9    | -0.54333               |
| PDE3B     | -0.71465               | PJA1     | -0.6792                | UBTD2         | -0.6461                | MGLL     | -0.6165                | SAP30    | -0.59188               | FAM127B       | -0.564                 | CNOT6    | -0.54308               |
| BRD8      | -0.71448               | BNIP3L   | -0.679                 | SCML1         | -0.6456                | TULP3    | -0.6161                | PICALM   | -0.59183               | DDX20         | -0.5625                | RSPH3    | -0.54233               |
| LCAT      | -0.71444               | DHCR7    | -0.6786                | SAR1B         | -0.6455                | FAM76B   | -0.6159                | TXNL1    | -0.5918                | KLHL36        | -0.5625                | RAP1B    | -0.5423                |
| NRARP     | -0.71417               | UQCRCF51 | -0.6782                | CLPX          | -0.6455                | LANCL3   | -0.6158                | MRPL22   | -0.59159               | ZNF91         | -0.5617                | PPP1R18  | -0.54221               |
| HMGNS     | -0.71389               | TRIP10   | -0.6774                | SGPP1         | -0.6453                | PSMD2    | -0.6141                | SUPT4H1  | -0.59122               | SPRY1         | -0.5616                | HIST4H4  | -0.54213               |
| MPHOSPH6  | -0.71372               | ZNF326   | -0.677                 | AREL1         | -0.6453                | CCZ1     | -0.6136                | NT5C3A   | -0.591                 | CCDC12        | -0.5616                | ERLEC1   | -0.54212               |
| UBE2V1    | -0.71332               | UBE2D1   | -0.676                 | DSTYK         | -0.6446                | ACTR3B   | -0.6135                | UPRT     | -0.59096               | TSSC4         | -0.5613                | LILRB4   | -0.54204               |
| AKT1S1    | -0.71309               | GXYLT1   | -0.6759                | ZC3H10        | -0.6442                | ELOVL5   | -0.6133                | SNX22    | -0.58954               | RAP2C         | -0.5608                | MTA2     | -0.54194               |
| DERL2     | -0.71233               | RARS     | -0.6758                | COX7B         | -0.643                 | RTP5     | -0.6132                | C11orf57 | -0.58929               | HECA          | -0.5606                | MESDC1   | -0.54187               |
| RABGGTB   | -0.71211               | PUM1     | -0.6755                | CTNS          | -0.6429                | GPS2     | -0.6127                | TTF1     | -0.58907               | SRP54         | -0.5598                | DHX8     | -0.54128               |
| CNOT8     | -0.71192               | GORASP2  | -0.6755                | MPP1          | -0.6417                | C1orf52  | -0.6125                | TMEM208  | -0.58898               | PSMB4         | -0.5595                | FZD6     | -0.54102               |
| SNX33     | -0.71161               | ZNF737   | -0.6749                | BCKDK         | -0.6408                | MMD      | -0.6117                | DHDDS    | -0.5885                | FAM83G        | -0.5592                | PTMA     | -0.54096               |
| FBXO45    | -0.71119               | SPATA2   | -0.6748                | DAGLB         | -0.6405                | TXNL4B   | -0.6115                | PSMB5    | -0.58833               | FBXL3         | -0.559                 | DFFA     | -0.54015               |
| KIAA1522  | -0.71109               | GAS8     | -0.6745                | MGST3         | -0.6404                | PITRM1   | -0.6114                | XRN2     | -0.58818               | ELF1          | -0.559                 | ARIH2    | -0.54001               |
| RSPRY1    | -0.71105               | PRUNE    | -0.6741                | ABT1          | -0.64                  | RAB18    | -0.6112                | ZNF180   | -0.58791               | XAB2          | -0.5588                | ZNF219   | -0.53993               |
| RBMX      | -0.71073               | TXNDC9   | -0.6732                | RAD21         | -0.6397                | FKBP14   | -0.6111                | GRPEL2   | -0.58772               | AP5Z1         | -0.5586                | SEC61G   | -0.53972               |
| TIMM17A   | -0.71066               | ABTB2    | -0.673                 | DYNLT1        | -0.6389                | PITHD1   | -0.6106                | RAB13    | -0.58736               | RIOK2         | -0.5585                | HLA-B    | -0.53939               |
| TMC6      | -0.71017               | ARID4B   | -0.6729                | SFMBT1        | -0.6388                | PAIP2    | -0.6102                | IL18RAP  | -0.58712               | KLHL21        | -0.5578                | IL2RG    | -0.53902               |
| SCD       | -0.70955               | ADGRD1   | -0.6726                | EMC8          | -0.6381                | EIF1AX   | -0.6102                | MANBAL   | -0.58623               | SLC38A7       | -0.5578                | CCDC71   | -0.53763               |
| ZNF266    | -0.70944               | 43164    | -0.6725                | ARL14EP       | -0.638                 | STARDA4  | -0.6102                | TXNDC15  | -0.58608               | PRELID3B      | -0.5564                | FBXL15   | -0.53737               |
| KLHL5     | -0.70941               | SF3B4    | -0.6717                | CFAP36        | -0.638                 | TOX4     | -0.6102                | SFR1     | -0.58534               | AP3M2         | -0.5559                | DHX40    | -0.53669               |
| MAN2A1    | -0.70869               | BLOC1S3  | -0.6713                | PANX1         | -0.637                 | MED4     | -0.6098                | TTC9C    | -0.58425               | TET2          | -0.5548                | BIN3     | -0.53603               |
| TSPAN14   | -0.70789               | ATG4A    | -0.6708                | SF3B5         | -0.6363                | RPP40    | -0.608                 | DCP2     | -0.58392               | ZNF154        | -0.5547                | TRMT10C  | -0.53552               |
| RQCD1     | -0.70757               | PSMC4    | -0.6707                | FNIP1         | -0.6363                | ZNF202   | -0.6079                | PIEZO2   | -0.58322               | CCDC82        | -0.5543                | NDUFA5   | -0.53513               |
| SPTSSA    | -0.70727               | VPS26A   | -0.6704                | WRAP53        | -0.6351                | HLA-C    | -0.6078                | SEC62    | -0.58317               | PSMA1         | -0.554                 | PLAA     | -0.53487               |
| PSMC2     | -0.70671               | CLIC1    | -0.6702                | FBXO8         | -0.6348                | ABCF2    | -0.606                 | UNG      | -0.5831                | NLE1          | -0.5529                | ISG15    | -0.53317               |
| MYO1C     | -0.7067                | MED21    | -0.6688                | RP11-437B10.1 | -0.6344                | KPNA5    | -0.6059                | POR      | -0.58234               | RNF8          | -0.5527                | ADNP2    | -0.53313               |
| DNAJC2    | -0.70587               | CEP85    | -0.6678                | ATP1B1        | -0.6337                | KCTD11   | -0.6053                | FAM104A  | -0.58228               | GPBP1L1       | -0.5521                | EFTUD2   | -0.53288               |
| ISCU      | -0.7053                | SMAD4    | -0.6676                | UBN1          | -0.6332                | GPR183   | -0.6053                | ANK3     | -0.58216               | MRPS2         | -0.552                 | GMPS     | -0.53191               |
| SETMAR    | -0.70328               | USP30    | -0.6675                | TIMM23        | -0.6328                | ZMYM5    | -0.6049                | ARHGAP21 | -0.58036               | LEO1          | -0.5518                | VAMP3    | -0.53188               |
| TP53RK    | -0.70293               | BMP2K    | -0.6667                | SAMD8         | -0.6326                | KPNA6    | -0.6047                | PAWR     | -0.58036               | SLC25A34      | -0.5513                | HPCAL1   | -0.53167               |
| RRBP1     | -0.70288               | MAP2K1   | -0.6662                | ZNF557        | -0.6326                | TCP11L1  | -0.6045                | RIOX1    | -0.57979               | TXNDC11       | -0.5511                | CAPZA1   | -0.53124               |
| CDK7      | -0.70243               | TCEAL3   | -0.666                 | DYRK1B        | -0.6325                | CLK4     | -0.6038                | HSD17B12 | -0.57944               | PLPP5         | -0.551                 | CMIP     | -0.53102               |
| AGFG1     | -0.70168               | SURF4    | -0.6648                | UBAP2         | -0.6321                | JAGN1    | -0.6034                | PPP1R16B | -0.57931               | RNF185        | -0.5505                | COPB2    | -0.53087               |
| PDCL      | -0.70059               | C6orf47  | -0.6647                | LRRC8B        | -0.6312                | MGAT4B   | -0.6026                | FOXP1    | -0.57912               | SCYL2         | -0.5501                | PLA2G4A  | -0.53052               |
| KIN       | -0.70018               | GAK      | -0.6642                | CHD4          | -0.6311                | ZNF300   | -0.6016                | PSMD7    | -0.57894               | ZNF225        | -0.55                  | MRPL12   | -0.53045               |
| RABIF     | -0.6993                | TAGLN    | -0.6641                | SH3BP5L       | -0.6308                | FAM65C   | -0.601                 | FLAD1    | -0.57871               | MSANTD3       | -0.5497                | SAT2     | -0.53043               |
| EMD       | -0.69846               | CBX1     | -0.6641                | SKP1          | -0.6307                | CASP6    | -0.6008                | ANAPC10  | -0.57853               | RPF1          | -0.5497                | ORC1     | -0.52974               |
| PTP4A2    | -0.69802               | KIF3A    | -0.6637                | DCLRE1B       | -0.6306                | TP53INP1 | -0.6002                | DTD1     | -0.57704               | TAOF9B        | -0.5496                | C8orf41  | -0.52962               |
| KBTBD2    | -0.69784               | FAM103A1 | -0.6624                | ZNF711        | -0.6296                | COPA     | -0.6002                | ARHGAP26 | -0.57661               | IFO7          | -0.5492                | IQSEC3   | -0.52946               |
| MED7      | -0.69774               | PRR14    | -0.662                 | BMPR2         | -0.6292                | AKAP8L   | -0.6002                | NBPF1    | -0.57543               | DNAJC6        | -0.5491                | FEM1B    | -0.529                 |
| RIPK2     | -0.69757               | PRPF39   | -0.6608                | LYPLA2        | -0.6269                | CARS     | -0.6001                | DOCK1    | -0.57509               | PEX26         | -0.5491                | SAFB     | -0.52889               |
| ASB7      | -0.69727               | TFG      | -0.6607                | CCDC174       | -0.6266                | LSM8     | -0.5996                | ZNF707   | -0.57393               | UBE2Q2        | -0.549                 | GNAI3    | -0.5287                |
| UBA6      | -0.69636               | TARS     | -0.6603                | TSFM          | -0.6263                | TERF2IP  | -0.5996                | RNF181   | -0.57392               | VKORC1        | -0.5489                | EHD1     | -0.5283                |
| ZC3H8     | -0.69547               | KIF3C    | -0.6602                | STAP1         | -0.6257                | RBM15B   | -0.5995                | SELT     | -0.57389               | CCDC26        | -0.5486                | HNRNP80  | -0.52789               |
| FBXO21    | -0.69539               | MED9     | -0.6598                | KLHL24        | -0.6251                | NFKBIB   | -0.5994                | CCDC130  | -0.57328               | PCSK7         | -0.5479                | ALG9     | -0.5278                |

| CLUSTER 1 |                        |            |                        |           |                        |             |                        |           |                        |           |                        |             |                        |
|-----------|------------------------|------------|------------------------|-----------|------------------------|-------------|------------------------|-----------|------------------------|-----------|------------------------|-------------|------------------------|
| DEG       | FC (log <sub>2</sub> ) | DEG        | FC (log <sub>2</sub> ) | DEG       | FC (log <sub>2</sub> ) | DEG         | FC (log <sub>2</sub> ) | DEG       | FC (log <sub>2</sub> ) | DEG       | FC (log <sub>2</sub> ) | DEG         | FC (log <sub>2</sub> ) |
| UPK3A     | -0.52721               | PIK3R6     | -0.5084                | FBXO42    | -0.484                 | INIP        | -0.3657                | ACTR10    | -0.4289                | PPP2R1A   | -0.4328                | ESPL1       | -0.25635               |
| POLD3     | -0.52719               | PKIG       | -0.5083                | NDE1      | -0.4839                | PATJ        | -0.3655                | SMARCD3   | -0.42845               | TLE1      | -0.431                 | HIST1H2AL   | -0.26759               |
| PDRG1     | -0.52675               | MFSD12     | -0.5078                | HIST1H2BN | -0.4832                | ATMIN       | -0.3653                | FAM160A2  | -0.42821               | TTL4      | -0.4306                | MLLT6       | -0.26666               |
| SEC22A    | -0.52669               | MICAL3     | -0.5066                | SEPSECS   | -0.4822                | PPP4C       | -0.4614                | IL10RA    | -0.42806               | SHOC2     | -0.4304                | DOCK3       | -0.2598                |
| NACC1     | -0.52663               | TRIM62     | -0.5063                | CFL2      | -0.4813                | WARS2       | -0.4609                | TBC1D10B  | -0.4275                | GFOD2     | -0.4299                | CYP2R1      | -0.25931               |
| EIF3J     | -0.52663               | EPT1       | -0.5059                | LY6G5B    | -0.4812                | ZMAT2       | -0.4609                | ICA1L     | -0.42748               | ZCCHC17   | -0.4297                | KLHL2       | -0.25906               |
| YEATS4    | -0.52657               | CTDP1      | -0.504                 | TIMP2     | -0.481                 | CEBPG       | -0.4608                | MYO9B     | -0.42703               | PSMD1     | -0.4291                | CCDC66      | -0.2556                |
| ZNF85     | -0.52645               | TOR1B      | -0.504                 | IMPA1     | -0.4805                | RBM5        | -0.4605                | SPIN1     | -0.42631               | TJAP1     | -0.3701                | CDC42SE2    | -0.25404               |
| ZNF486    | -0.5261                | FAM63A     | -0.5036                | OTUD4     | -0.4804                | MTCH1       | -0.4603                | NDUFB8    | -0.42611               | RDH10     | -0.370                 | DUS4L       | -0.25193               |
| JMJD1C    | -0.52604               | NSMCE2     | -0.5033                | NUP88     | -0.4803                | PRDX6       | -0.4593                | MINOS1    | -0.42516               | MFSD6     | -0.3695                | CHRNA10     | -0.24993               |
| TRAFD1    | -0.52598               | GPATCH3    | -0.5031                | BCAT1     | -0.4801                | TOR2A       | -0.4592                | KPNA1     | -0.42457               | FUBP1     | -0.3658                | MYBL2       | -0.24931               |
| TRIM13    | -0.52587               | LINS1      | -0.5031                | PARL      | -0.4799                | PROSER2     | -0.4584                | BTBD10    | -0.42405               | PGM2L1    | -0.3652                | ZFP69       | -0.24468               |
| RBSN1     | -0.52585               | EIF5A      | -0.5022                | ZNF586    | -0.4798                | GMFB        | -0.4583                | ABHD6     | -0.42204               | GPATCH2L  | -0.365                 | SPNS2       | -0.24026               |
| HARS      | -0.52585               | GTF2E1     | -0.5017                | GSPT2     | -0.4795                | GUCD1       | -0.4581                | CAPN2     | -0.42171               | WASL      | -0.3623                | ARID5A      | -0.23896               |
| C11orf95  | -0.52527               | HIF1AN     | -0.501                 | TFRC      | -0.4794                | N4BP2L1     | -0.4577                | RREB1     | -0.42069               | PRMT1     | -0.361                 | DCUN1D4     | -0.23803               |
| MAPK7     | -0.5251                | WDR13      | -0.5007                | RELN      | -0.4793                | IMP3        | -0.4575                | ILKAP     | -0.41947               | KLHL20    | -0.3587                | TG          | -0.2365                |
| TIGAR     | -0.52427               | YOD1       | -0.5006                | EMSY      | -0.4791                | TGS1        | -0.4574                | PCDH9     | -0.41871               | CCNG2     | -0.3583                | PPFIBP2     | -0.22931               |
| BAP1      | -0.52419               | MUL1       | -0.5002                | PSME4     | -0.479                 | IGHMBP2     | -0.456                 | ZNF16     | -0.41821               | NEDD1     | -0.3569                | PLCH2       | -0.22722               |
| MFSD9     | -0.5241                | CDH1       | -0.5                   | NFIC      | -0.4789                | UBE2R2      | -0.4553                | ESCO1     | -0.4182                | PUF60     | -0.3567                | HSPA1B      | -0.2253                |
| VDAC1     | -0.52348               | HINFP      | -0.5                   | RAPGEF2   | -0.4788                | RHOG        | -0.4552                | EGLN3     | -0.41809               | SDHAF1    | -0.3561                | ERBB2       | -0.22314               |
| C1orf122  | -0.52291               | THAP4      | -0.4999                | CLMN      | -0.4787                | RP3-329A5.4 | -0.4549                | UBXN7     | -0.41672               | TRAK2     | -0.3559                | CSTB        | -0.22103               |
| LARPA4    | -0.52283               | MYL6       | -0.4998                | DONSON    | -0.4786                | BLOC1S2     | -0.4545                | ZNF7      | -0.4166                | UBR4      | -0.3547                | ZNF217      | -0.21986               |
| TEX30     | -0.52215               | NUBP1      | -0.4998                | SOS2      | -0.4776                | ARL13B      | -0.454                 | KIAA0895L | -0.41646               | ZNF253    | -0.3545                | CDC6        | -0.21468               |
| CACNA1F   | -0.52183               | RAB11FIP4  | -0.4997                | TMPPE     | -0.4769                | MYEF2       | -0.4538                | NSMF      | -0.41514               | PRKAA1    | -0.3542                | C17orf107   | -0.19783               |
| ABCE1     | -0.52176               | DIP2C      | -0.4995                | CCZ1B     | -0.4769                | ZFP91       | -0.4536                | COG1      | -0.41246               | TMEM214   | -0.3533                | ITSN1       | -0.18778               |
| ARID3B    | -0.52035               | COPB1      | -0.4994                | PPP2CB    | -0.4762                | MBD4        | -0.4534                | CSNK2B    | -0.41123               | AKT3      | -0.3533                | CSRP1       | -0.18564               |
| ABCA5     | -0.51985               | EBP        | -0.4984                | EYA3      | -0.476                 | C12orf29    | -0.4527                | ELP5      | -0.40984               | PANK3     | -0.3514                | CACNB4      | -0.18125               |
| LIN9      | -0.5198                | TINAGL1    | -0.4976                | NCAPD3    | -0.4755                | NRXN2       | -0.4515                | BAG4      | -0.4083                | NOL4L     | -0.3498                | MRPL54      | -0.17919               |
| TOE1      | -0.51978               | C12orf65   | -0.4971                | SIGLEC10  | -0.4753                | C14orf119   | -0.4514                | UNC45A    | -0.40788               | SACM1L    | -0.3488                | RC3H2       | -0.1779                |
| RALGAPA1  | -0.51949               | BFAR       | -0.4971                | NPLOC4    | -0.4751                | ZNF805      | -0.4512                | ATP5G3    | -0.40518               | ODF3B     | -0.3457                | RNF144A     | -0.17497               |
| OTUD3     | -0.51941               | PHTF1      | -0.497                 | MATR3     | -0.4744                | FBXL19      | -0.4501                | ANXA11    | -0.40458               | C8orf76   | -0.3452                | ZNF671      | -0.17326               |
| FBXW11    | -0.51935               | IFI16      | -0.4963                | STK35     | -0.4738                | ZNF706      | -0.4491                | G2E3      | -0.40405               | HLA-DMA   | -0.344                 | PLXDC2      | -0.16996               |
| GNB4      | -0.5192                | RABAC1     | -0.4961                | SLC35E4   | -0.4737                | SLC26A2     | -0.4489                | SREBF2    | -0.40342               | RORA      | -0.3432                | RNF34       | -0.16379               |
| PIIG      | -0.51912               | FBXO46     | -0.4955                | HDAC2     | -0.4735                | DPF2        | -0.4487                | PCNX4     | -0.40322               | STARD9    | -0.3398                | MAP109326.1 | -0.16361               |
| RNF144B   | -0.51897               | CERS5      | -0.4953                | RAB4B     | -0.4723                | MAGT1       | -0.4469                | ZNF853    | -0.40193               | JADE3     | -0.3388                | AIG1        | -0.15333               |
| ZKSCAN8   | -0.51844               | QPR1       | -0.4951                | CEP97     | -0.4718                | AAMP        | -0.4463                | NAPB      | -0.40095               | SLC36A1   | -0.3376                | LRRC3       | -0.15235               |
| MAP4K5    | -0.5181                | RPL36AL    | -0.495                 | PHF10     | -0.4713                | RAN         | -0.4455                | TUBA1C    | -0.40038               | REV3L     | -0.3368                | CDT1        | -0.15141               |
| LUZP1     | -0.51803               | TTC13      | -0.4949                | TRIM23    | -0.4709                | PWP1        | -0.4454                | POMP      | -0.39817               | NEU3      | -0.3353                | RARRES2     | -0.14527               |
| DEDD      | -0.51747               | USP14      | -0.4944                | ZNF622    | -0.4708                | FBXO7       | -0.4447                | CAMKK1    | -0.39745               | TTN       | -0.3352                | TRIM39      | -0.14523               |
| ST3GAL1   | -0.51735               | BTG1       | -0.4942                | ZNF747    | -0.4705                | CCL3        | -0.4437                | C14orf156 | -0.3972                | TMEM44    | -0.3315                | POLR3B      | -0.14168               |
| ZNF616    | -0.5172                | SGPL1      | -0.4941                | CHRNB1    | -0.4703                | ZFAND6      | -0.4435                | TMEM64    | -0.39698               | KRTCAP2   | -0.3303                | NSF         | -0.13056               |
| ARPC5L    | -0.51652               | LDB1       | -0.494                 | ISY1      | -0.4701                | TRIM68      | -0.4431                | TTL       | -0.39531               | SUDS3     | -0.328                 | ABCA9       | -0.1271                |
| SLC25A13  | -0.51641               | L2HGDH     | -0.4939                | CTS2      | -0.4694                | DCAF8       | -0.4425                | APMAP     | -0.39185               | PIGV      | -0.3278                | KIF11       | -0.12663               |
| PHF20L1   | -0.51584               | SNRNP27    | -0.493                 | MESDC2    | -0.4692                | DCUN1D1     | -0.4425                | FAM175B   | -0.39009               | DHRS7B    | -0.3248                | SCN3A       | -0.12578               |
| GBF1      | -0.51541               | ASXL1      | -0.493                 | NIPSNAP3B | -0.4692                | SMURF1      | -0.4425                | NARS2     | -0.38943               | TECPR2    | -0.3214                | PLCB1       | -0.12544               |
| INO80C    | -0.51529               | NEK7       | -0.4927                | ZKSCAN4   | -0.469                 | TMED1       | -0.4417                | C6orf1    | -0.38917               | MAP3K6    | -0.3201                | CENPK       | -0.1242                |
| AAED1     | -0.5149                | FAM160B1   | -0.4927                | TMSB10    | -0.4685                | KNSTRN      | -0.4415                | PLAGL1    | -0.38908               | BTRC      | -0.3184                | EHHADH      | -0.12048               |
| RAP2B     | -0.51439               | DNAJC5     | -0.4921                | RIPK1     | -0.4684                | BAG3        | -0.4411                | ARID5B    | -0.38832               | SNX27     | -0.3175                | IRF2        | -0.11588               |
| ZNF345    | -0.51394               | FAM134B    | -0.4919                | ZNF197    | -0.4682                | SNRPB       | -0.44                  | HMG20A    | -0.38746               | FCHO2     | -0.3161                | SH3GL1      | -0.11522               |
| DCAF16    | -0.51384               | MIER1      | -0.4918                | STK26     | -0.4681                | CASP8       | -0.4397                | ZNF107    | -0.38554               | POMK      | -0.312                 | FSTL1       | -0.11063               |
| RBM7      | -0.51373               | LILRA6     | -0.491                 | C19orf79  | -0.4676                | DCTN6       | -0.4396                | PFKL      | -0.38546               | FAH       | -0.3101                | KIAA1328    | -0.09798               |
| TP11      | -0.512                 | MEI1       | -0.4909                | SLC44A1   | -0.4673                | ZNF653      | -0.4391                | TSTD2     | -0.38345               | PUS7      | -0.3097                | THBD        | -0.09386               |
| PLEKHA3   | -0.51192               | PHF19      | -0.4906                | CDK9      | -0.4665                | ATL3        | -0.4389                | MYO1B     | -0.38285               | USP9Y     | -0.3067                | MT2A        | -0.09279               |
| ASB6      | -0.51192               | SLC35B2    | -0.4902                | DLGAP4    | -0.4661                | ABCB10      | -0.4388                | RSL24D1   | -0.38251               | ZNF841    | -0.3051                | MAP3K20     | -0.08221               |
| TP53BP1   | -0.5117                | IGBP1      | -0.4891                | AGO1      | -0.4659                | ZNF772      | -0.4385                | SRPK1     | -0.38029               | E2F3      | -0.3035                | C5orf30     | -0.07377               |
| TMEM120A  | -0.51167               | UPF3B      | -0.4889                | BDH2      | -0.4658                | ZFP82       | -0.4382                | RHBDD2    | -0.37887               | RPS10     | -0.3027                | ZNF568      | -0.07339               |
| ARPI1     | -0.51133               | GNP1       | -0.4889                | PRRC1     | -0.4657                | PSMB6       | -0.4382                | NAP1L4    | -0.37786               | HERC6     | -0.299                 | ALDH7A1     | -0.06744               |
| FAM89B    | -0.5111                | NOD2       | -0.4884                | KANSL3    | -0.4649                | SEL1L3      | -0.4372                | MTSS1     | -0.37678               | SLC25A28  | -0.2981                | RP11-40A7.2 | -0.06399               |
| MRPL17    | -0.51034               | FAM133B    | -0.488                 | DTX3L     | -0.4649                | GTPBP2      | -0.4369                | LY6E      | -0.37637               | IL1RAP    | -0.2957                | CATSPERG    | -0.05932               |
| CDK2      | -0.51023               | RBPJ       | -0.4878                | C7orf43   | -0.4648                | GPR137      | -0.4367                | BMP1      | -0.37633               | FAM69A    | -0.292                 | ZNF324B     | -0.04673               |
| UBE2A     | -0.51013               | AC017099.3 | -0.4874                | C5orf24   | -0.4644                | ZNF431      | -0.4364                | FPGS      | -0.37476               | FNDC3A    | -0.2899                | SP140       | -0.04104               |
| CRTC2     | -0.51008               | WIZ        | -0.4863                | CNPY2     | -0.4642                | 43165       | -0.4354                | ACIN1     | -0.37356               | SECISBP2L | -0.289                 | ID3         | -0.03814               |
| WBP11     | -0.50989               | ARFGAP1    | -0.4858                | TMTCC3    | -0.4641                | TAF9        | -0.4353                | HLA-DPA1  | -0.37338               | ZBTB41    | -0.289                 | SSPO        | -0.03723               |
| ARL8A     | -0.5096                | AKR1C3     | -0.4857                | STAT6     | -0.4628                | ZFP28       | -0.4352                | ARHGAP31  | -0.37334               | ZW10      | -0.283                 | RAB20       | -0.02956               |
| APLF      | -0.50921               | WIPF2      | -0.4849                | MED28     | -0.4628                | MED10       | -0.4346                | ZNF169    | -0.37234               | MFHAS1    | -0.2827                | TEX14       | -0.01612               |
| MYPOP     | -0.50899               | REST       | -0.4849                | NAPG      | -0.4619                | URB2        | -0.4333                | ZNF660    | -0.37197               | MYH11     | -0.2801                | APOE        | -0.00905               |
| CLN5      | -0.50866               | ACSL4      | -0.4848                | NACC2     | -0.4617                | TRPC4AP     | -0.4332                | FAM221A   | -0.37188               | SGO1      | -0.2775                | PHLDB2      | 0.003597               |
| HLA-DPB1  | -0.50848               | ACADVL     | -0.484                 | TSPYL4    | -0.4615                | MTR         | -0.4329                | SVIL      | -0.37146               | SCAND1    | -0.2755                | GPR18       | 0.014173               |
|           |                        |            |                        |           |                        |             |                        | MSH6      | -0.37027               | WDHD1     | -0.2726                | AK1         | 0.026351               |
|           |                        |            |                        |           |                        |             |                        |           |                        | MED12     | -0.2588                | MYH7B       | 0.029058               |

| CLUSTER 2     |                        |               |                        |                |                        |               |                        |          |                        |          |                        |          |                        |
|---------------|------------------------|---------------|------------------------|----------------|------------------------|---------------|------------------------|----------|------------------------|----------|------------------------|----------|------------------------|
| DEG           | FC (log <sub>2</sub> ) | DEG           | FC (log <sub>2</sub> ) | DEG            | FC (log <sub>2</sub> ) | DEG           | FC (log <sub>2</sub> ) | DEG      | FC (log <sub>2</sub> ) | DEG      | FC (log <sub>2</sub> ) | DEG      | FC (log <sub>2</sub> ) |
| SLC27A1       | 1.542972               | ZNF618        | 1.4769                 | ZC3H12D        | 1.42515                | MICU1         | 1.36019                | FBP1     | 1.31514                | C1RL     | 1.25991                | SUPT3H   | 1.213714               |
| ADD3          | 1.54288                | ORAI2         | 1.47679                | TFAP4          | 1.42473                | NEURL1        | 1.35994                | ZFP64    | 1.31482                | ITGB2    | 1.25871                | PHF2     | 1.213164               |
| ZNF652        | 1.542596               | NMRAL1        | 1.47662                | TRAM2          | 1.42381                | GF11          | 1.35961                | GLTSCR1L | 1.3148                 | POLR3K   | 1.25817                | AKR7A2   | 1.211585               |
| NUDT17        | 1.540387               | PHACTR1       | 1.47482                | ANKRD13D       | 1.4223                 | P2RX7         | 1.35939                | L3MBTL2  | 1.31424                | SH3KBP1  | 1.25806                | RALGAP2  | 1.209408               |
| ZNF395        | 1.53956                | HIST1H2BE     | 1.47457                | SNX29          | 1.42219                | ZMYM1         | 1.35889                | TMEM168  | 1.31421                | DIP2A    | 1.25791                | SNTB1    | 1.208882               |
| TMEM170B      | 1.539339               | RBL2          | 1.47431                | PTGS1          | 1.42178                | LACTB2        | 1.35848                | RECQL5   | 1.31297                | ERI3     | 1.25713                | LTBR     | 1.208391               |
| PYGM          | 1.538316               | CH507-42P11.8 | 1.4735                 | IQGAP2         | 1.42175                | CRTC1         | 1.35725                | C1orf162 | 1.31218                | SUSD1    | 1.2569                 | TMEM19   | 1.208378               |
| GLRX          | 1.537061               | ATP2B4        | 1.4726                 | VAMP8          | 1.42143                | MAML3         | 1.35719                | MMP15    | 1.31207                | INTS3    | 1.25646                | MSH5     | 1.207787               |
| CCDC186       | 1.535772               | MDN1          | 1.47227                | HIC1           | 1.42061                | SCAMP5        | 1.35684                | C6orf203 | 1.31112                | FPGT     | 1.2549                 | PSMB9    | 1.206977               |
| KLHL15        | 1.535289               | MAP2K6        | 1.47226                | SEMA5A         | 1.419                  | ST3GAL2       | 1.35615                | FAM46A   | 1.31097                | POU2F2   | 1.25429                | RTKN     | 1.205673               |
| JUNB          | 1.533821               | EPHX1         | 1.47212                | MEF2A          | 1.41841                | CNTNAP1       | 1.35571                | PRIM2    | 1.30865                | PRMT3    | 1.2537                 | CLDN23   | 1.205326               |
| APOBEC3C      | 1.533547               | DCLK2         | 1.47177                | ADRKB1         | 1.41796                | ADAM11        | 1.35454                | CUX1     | 1.30738                | CYP2D6   | 1.2534                 | MYO15B   | 1.204918               |
| IQSEC1        | 1.529911               | ATG4C         | 1.47044                | MYCBP          | 1.41737                | PLCXD2        | 1.35448                | IQCE     | 1.30573                | CD36     | 1.25295                | POLR3GL  | 1.203699               |
| IGSF6         | 1.527765               | FBXO32        | 1.4687                 | MGME1          | 1.41562                | LMBRD2        | 1.35397                | ACSS1    | 1.30534                | ANAPC16  | 1.25288                | NSMCE3   | 1.203255               |
| OBFC1         | 1.52756                | HSPG2         | 1.46636                | PRR5L          | 1.41548                | HERC3         | 1.353                  | NR1D1    | 1.30517                | SHISA5   | 1.25218                | IL11RA   | 1.202948               |
| STMN3         | 1.526867               | SHTN1         | 1.46636                | NLRP7          | 1.41453                | PRKCA         | 1.35213                | DNAJC13  | 1.30434                | ARID1B   | 1.25185                | RHPN1    | 1.201772               |
| SDHAF3        | 1.5264                 | USP18         | 1.46404                | ZNF573         | 1.40898                | MBTPS2        | 1.35206                | RNF139   | 1.30433                | KPTN     | 1.25182                | LMO4     | 1.201392               |
| XYLT2         | 1.525807               | SP110         | 1.46367                | NHLRC3         | 1.40868                | TMEM129       | 1.35194                | TET3     | 1.30388                | METTL25  | 1.25167                | RCN3     | 1.201335               |
| FAM168A       | 1.524063               | PIK3AP1       | 1.46267                | CCDC191        | 1.40694                | XXYL1         | 1.35162                | BTK      | 1.30387                | KLHDC1   | 1.24978                | UBE2E1   | 1.200175               |
| STAC3         | 1.522519               | PAIP2B        | 1.46227                | CXorf23        | 1.40687                | MGST2         | 1.35085                | NCOR2    | 1.30351                | THEM6    | 1.24943                | MAP3K4   | 1.199999               |
| TTC24         | 1.521241               | DNASE1        | 1.46088                | TXNIP          | 1.40567                | MSRB3         | 1.35066                | HIGD1A   | 1.30335                | KIAA2013 | 1.24744                | MXI1     | 1.199169               |
| ANKRD39       | 1.518195               | COQ7          | 1.45921                | PLCB4          | 1.40449                | RFT1          | 1.35027                | CECR5    | 1.30131                | MAP2K5   | 1.24608                | DOCK2    | 1.199159               |
| CDKN2AIPNL    | 1.517658               | EPS8L1        | 1.45875                | HIBADH         | 1.40085                | RP11-167P11.3 | 1.34995                | CDK5     | 1.3007                 | AMDHD2   | 1.24583                | OBSCN    | 1.198616               |
| PQLC3         | 1.515242               | SLC12A3       | 1.45771                | RPP21          | 1.39971                | TNFSF13B      | 1.34974                | RELL2    | 1.30051                | SMYD2    | 1.24581                | SYNE1    | 1.198589               |
| HSPA2         | 1.51518                | SMARCAL1      | 1.45766                | SAMD14         | 1.39885                | ALDOC         | 1.34827                | BICD2    | 1.29945                | LMNTD2   | 1.2448                 | CARNS1   | 1.198353               |
| SLC25A20      | 1.514876               | MZB1          | 1.45737                | B3GNTL1        | 1.3986                 | KCNK10        | 1.34761                | CASP1    | 1.29865                | ARHGAP18 | 1.2443                 | FAM173A  | 1.197638               |
| TDRD1         | 1.514178               | SHANK1        | 1.45698                | LPCAT4         | 1.39803                | C19orf38      | 1.34756                | WDR92    | 1.29754                | SLC35B3  | 1.24322                | ZNF692   | 1.196634               |
| NOD1          | 1.512964               | GPR162        | 1.45691                | ABHD8          | 1.39762                | SRGAP2        | 1.34647                | EVC2     | 1.2968                 | SLC23A2  | 1.24258                | DENND5B  | 1.194003               |
| GALNT6        | 1.512702               | TTC39A        | 1.45662                | FEZ2           | 1.39634                | ACSL5         | 1.34609                | PTK2B    | 1.29421                | SERPINF1 | 1.24242                | CCDC50   | 1.192517               |
| CEACAM21      | 1.512044               | ZMAT5         | 1.45431                | GNPDA1         | 1.39309                | ADA           | 1.34558                | C17orf67 | 1.29414                | C9orf142 | 1.23805                | DXO      | 1.190048               |
| TGFBR2        | 1.509682               | DDX60         | 1.45392                | TCFL5          | 1.39307                | FARS2         | 1.34536                | LRRRC8D  | 1.29285                | UTRN     | 1.23745                | CISD3    | 1.189748               |
| SNAPC5        | 1.509119               | TPK1          | 1.45383                | DHRS4L2        | 1.39276                | QRICH2        | 1.34517                | ALG8     | 1.29271                | TMBIM4   | 1.23721                | JMY      | 1.18845                |
| DGKD          | 1.508862               | CYP4V2        | 1.45209                | TASP1          | 1.39092                | PRX           | 1.34353                | PRAG1    | 1.29079                | INPP5D   | 1.23565                | GTF2IRD2 | 1.18765                |
| EXOSC5        | 1.508852               | FAM53A        | 1.45149                | CBX8           | 1.39038                | FAM111A       | 1.34273                | GAB3     | 1.2906                 | TRMT2B   | 1.23444                | DTWD2    | 1.186848               |
| ACADSB        | 1.507561               | MCCC1         | 1.45081                | CCDC146        | 1.38976                | HERC5         | 1.34201                | FYCO1    | 1.29033                | BCL7A    | 1.23442                | NR1D2    | 1.186489               |
| STX10         | 1.505713               | SLC2A11       | 1.44915                | ACSF3          | 1.38713                | DTD2          | 1.3417                 | IRF5     | 1.28961                | HK2      | 1.23369                | TTC7A    | 1.186384               |
| C4orf27       | 1.505542               | LRP5          | 1.44867                | TMCC1          | 1.3853                 | NCKIPSD       | 1.34165                | LANCL1   | 1.28959                | LCP1     | 1.23362                | APOA     | 1.186073               |
| PCYOX1        | 1.505212               | GAL3ST4       | 1.44547                | DOPEY2         | 1.38356                | SH2D3C        | 1.34073                | STAMBPL1 | 1.28796                | KLF12    | 1.23282                | TMEM141  | 1.184657               |
| VPS13C        | 1.504844               | FAM53C        | 1.44537                | MC1R           | 1.38303                | ABHD15        | 1.33811                | PLEKHA2  | 1.28789                | CEP131   | 1.23242                | R3HDM1   | 1.184164               |
| WDR66         | 1.504304               | C11orf21      | 1.44487                | TTC21A         | 1.38293                | SLC2A8        | 1.33739                | EIF4EBP1 | 1.28705                | ACYP1    | 1.23164                | SKP2     | 1.184103               |
| CORO2A        | 1.503338               | CD99L2        | 1.44478                | CERS6          | 1.38238                | ARMC10        | 1.33557                | MED13L   | 1.28598                | RTN4IP1  | 1.23144                | HIBCH    | 1.183917               |
| CCDC86        | 1.503094               | C15orf52      | 1.44424                | RFXAP          | 1.38022                | FKBP15        | 1.33541                | NT5DC1   | 1.28538                | NT5DC3   | 1.23064                | FUCA1    | 1.182975               |
| TRAPPC12      | 1.50199                | UMAD1         | 1.44379                | FANCI          | 1.38004                | IER2          | 1.3337                 | RECK     | 1.28506                | TPCN1    | 1.23059                | KBTBD7   | 1.182947               |
| TEP1          | 1.50142                | UBE2L6        | 1.44369                | NHLRC4         | 1.37898                | TMEM109       | 1.33358                | ATF3     | 1.28267                | NCOA2    | 1.23033                | RHOB     | 1.182849               |
| PEX7          | 1.500362               | SCRN3         | 1.44338                | KDM1B          | 1.37804                | ATP10D        | 1.33264                | POC1A    | 1.28256                | UBE2S    | 1.22977                | SNAPC3   | 1.18245                |
| SLC2A6        | 1.499813               | BBS9          | 1.44321                | GGH            | 1.37799                | DTX3          | 1.33227                | EIF4G3   | 1.28051                | TRIM8    | 1.22924                | CEBPA    | 1.1822                 |
| TMEM209       | 1.499631               | CDH23         | 1.44266                | CASP8AP2       | 1.37701                | SLC2A9        | 1.33211                | ZNF703   | 1.28042                | ZNRF2    | 1.2283                 | TSEN15   | 1.181335               |
| SLC25A43      | 1.49809                | STAU2         | 1.43939                | ZDHHC21        | 1.37658                | STXBP4        | 1.33156                | ALKBH8   | 1.2793                 | CCDC138  | 1.22811                | ZNF362   | 1.180281               |
| PIP4K2A       | 1.497586               | ZNF276        | 1.43881                | CCND3          | 1.3762                 | PTPRJ         | 1.33133                | GABRR2   | 1.27821                | USP6NL   | 1.22708                | MAST3    | 1.179821               |
| RP11-164J13.1 | 1.497582               | RBCK1         | 1.43778                | MAP4K1         | 1.3747                 | SRPX          | 1.33113                | TRIM44   | 1.27736                | NCOA1    | 1.22556                | TMTC4    | 1.178246               |
| DEF8          | 1.497466               | CNTRL         | 1.43607                | NUP210         | 1.37412                | MTMR12        | 1.33066                | SORD     | 1.2772                 | RABL2B   | 1.22491                | MAPRE2   | 1.177751               |
| BLNK          | 1.496863               | FBXW5         | 1.4351                 | RP11-298J23.10 | 1.37371                | PON2          | 1.3305                 | FLNB     | 1.27664                | GHDC     | 1.22439                | SETDB2   | 1.177463               |
| CLEC10A       | 1.496382               | PPP3CA        | 1.43464                | SLC47A1        | 1.37351                | FGD3          | 1.33006                | BTBD2    | 1.27578                | HHAT     | 1.22406                | KCNK1    | 1.176484               |
| NADK          | 1.496107               | TMEM251       | 1.43457                | INTS10         | 1.37249                | PRMT7         | 1.32966                | PYURF    | 1.27549                | OGG1     | 1.22364                | PIP5K2B  | 1.175532               |
| LDAH          | 1.49577                | NSD1          | 1.4336                 | RASGRP2        | 1.37094                | ARHGEF4       | 1.3294                 | ITPR2    | 1.27357                | DERL3    | 1.22284                | ARV1     | 1.175095               |
| NIPSNAP1      | 1.493412               | ZDHHC17       | 1.43348                | MPPE1          | 1.37058                | NSL1          | 1.32626                | DACT1    | 1.27254                | GCSAM    | 1.22265                | PLCG2    | 1.174994               |
| POP5          | 1.49192                | CYSLTR1       | 1.43306                | ALPK1          | 1.37057                | STARD10       | 1.32512                | CHD9     | 1.27196                | TMEM128  | 1.22265                | IFT140   | 1.173759               |
| GJC2          | 1.491771               | MYO1F         | 1.43281                | MSH3           | 1.37051                | CRTAP         | 1.32492                | YPEL1    | 1.27095                | SH3BP2   | 1.22128                | ACBD6    | 1.173456               |
| OSM           | 1.48953                | KRCC1         | 1.43191                | XKR6           | 1.36983                | ZNF296        | 1.32474                | PACS2    | 1.27079                | GGCT     | 1.22029                | FBXO44   | 1.172072               |
| ADGRE2        | 1.488556               | STRA13        | 1.43048                | FBXO4          | 1.36943                | ABI2          | 1.32467                | RNF123   | 1.26771                | C11orf80 | 1.21999                | ZRANB3   | 1.171514               |
| BANK1         | 1.484983               | GLT25D1       | 1.42992                | CNNM3          | 1.36918                | SUMF1         | 1.32452                | MLLT1    | 1.26655                | CORO1B   | 1.21989                | GZF1     | 1.171435               |
| SLC7A6        | 1.484981               | MBNL3         | 1.42966                | PARN           | 1.36816                | MTAP          | 1.32316                | ATP6V0A1 | 1.26628                | ADD1     | 1.21896                | CUL4B    | 1.171112               |
| TNF           | 1.483749               | FTCDNL1       | 1.42892                | KCNK17         | 1.36651                | LRRC16A       | 1.32209                | CREB3L2  | 1.26579                | SPATA5   | 1.21787                | PCYT2    | 1.170932               |
| EHBP1         | 1.482924               | MLH3          | 1.42873                | RAP1GDS1       | 1.36577                | FIG4          | 1.32071                | NLRC5    | 1.2646                 | ATPIF1   | 1.21717                | SCFD2    | 1.170774               |
| KIAA0226L     | 1.481743               | CAT           | 1.42804                | SKAP2          | 1.36361                | RNASEH2B      | 1.32037                | DERA     | 1.26397                | FHL1     | 1.21629                | C4orf3   | 1.169135               |
| CSRP2BP       | 1.480028               | PRKCB         | 1.42731                | LILRA2         | 1.36344                | SNUPN         | 1.31963                | SERPINI1 | 1.26364                | GIMAP2   | 1.21599                | RASGRP4  | 1.167615               |
| IRF8          | 1.47941                | VCL           | 1.42666                | CECR1          | 1.36319                | SOCS3         | 1.31816                | CCDC183  | 1.26361                | NAA38    | 1.21581                | SNRNP25  | 1.167608               |
| PLCL2         | 1.479323               | KHDRBS2       | 1.42619                | CCDC152        | 1.36038                | PAM16         | 1.3165                 | GLIPR1   | 1.26102                | RHBDD1   | 1.21514                | DTX2     | 1.167594               |
| BBS10         | 1.478157               | SLC25A42      | 1.42553                | FAM210B        | 1.36036                | CPPED1        | 1.31636                | ACAP1    | 1.26067                | TMEM156  | 1.21448                | ZNF540   | 1.167283               |
| PIGH          | 1.477987               | PPM1K         | 1.42522                | TMEM91         | 1.36026                | SPIB          | 1.31525                | KIAA1109 | 1.26065                | RFX3     | 1.21425                | ATAD5    | 1.166984               |











| CLUSTER 4 |                        |           |                        |         |                        |          |                        |           |                        |          |                        |            |                        |
|-----------|------------------------|-----------|------------------------|---------|------------------------|----------|------------------------|-----------|------------------------|----------|------------------------|------------|------------------------|
| DEG       | FC (log <sub>2</sub> ) | DEG       | FC (log <sub>2</sub> ) | DEG     | FC (log <sub>2</sub> ) | DEG      | FC (log <sub>2</sub> ) | DEG       | FC (log <sub>2</sub> ) | DEG      | FC (log <sub>2</sub> ) | DEG        | FC (log <sub>2</sub> ) |
| IER5L     | 1.888718               | DAB2      | 1.82526                | VWA8    | 1.76562                | IFFO2    | 1.7073                 | EPHB1     | 1.66958                | TTC39C   | 1.62444                | EMILIN1    | 1.583532               |
| LYRM7     | 1.886612               | DCPS      | 1.82297                | POU4F1  | 1.76279                | SLC18A2  | 1.70706                | PTGS2     | 1.66908                | LPGAT1   | 1.62373                | IGSF22     | 1.580745               |
| BIN2      | 1.883158               | RSPH1     | 1.81947                | FCER1A  | 1.76214                | APC2     | 1.70675                | QDPR      | 1.66878                | USP46    | 1.62358                | CDPF1      | 1.580136               |
| TBC1D14   | 1.880879               | SMIM5     | 1.81901                | REER    | 1.75862                | RAD51AP1 | 1.7037                 | TM7SF3    | 1.66867                | PACSN1   | 1.6227                 | SPATA2L    | 1.579178               |
| ZBTB18    | 1.877709               | LIMD1     | 1.81851                | SASH3   | 1.75674                | MEF2C    | 1.7033                 | PNPLA4    | 1.66642                | CCR5     | 1.62034                | TCTA       | 1.579128               |
| EPS8L2    | 1.877525               | RPS6KL1   | 1.81843                | CALHM2  | 1.75661                | MYCBP2   | 1.70245                | PRKCD     | 1.6658                 | MGAT4A   | 1.62031                | TMEM182    | 1.578299               |
| AFF3      | 1.875791               | RNF213    | 1.81838                | VWA2    | 1.75566                | PIGK     | 1.70144                | SORL1     | 1.66383                | MYO9A    | 1.61778                | C12orf66   | 1.577605               |
| C2CD2     | 1.873632               | LRRC26    | 1.81807                | KLF13   | 1.7527                 | CYB561A3 | 1.70113                | POLG2     | 1.66326                | LDLRAD2  | 1.61685                | DSN1       | 1.577044               |
| PTGDS     | 1.87226                | LDOC1     | 1.81616                | FOXRED2 | 1.75108                | EMB      | 1.7006                 | PAQR8     | 1.66255                | GLO1     | 1.61532                | CHEK2      | 1.573243               |
| ARL11     | 1.868935               | NGFR      | 1.81538                | IKBKE   | 1.74228                | SLC38A1  | 1.70025                | C7orf31   | 1.66096                | SLC37A1  | 1.61459                | TYSND1     | 1.5732                 |
| ANXA2R    | 1.866682               | CBFA2T3   | 1.81484                | PFKFB2  | 1.74188                | HPS3     | 1.6986                 | ARHGAP17  | 1.65998                | FCER1G   | 1.61418                | ZNF594     | 1.57316                |
| EME1      | 1.86617                | NOTCH3    | 1.80938                | RASSF7  | 1.74131                | PSD4     | 1.69803                | CD79B     | 1.65971                | KRI1     | 1.61302                | CSGALNACT1 | 1.571502               |
| ANKRD44   | 1.863976               | METRN     | 1.80861                | CTSO    | 1.74054                | MAPKAPK3 | 1.697                  | DOCK10    | 1.6593                 | ATXN7L1  | 1.6104                 | DGKZ       | 1.57048                |
| JAK2      | 1.86384                | DHFR      | 1.80676                | ST6GAL1 | 1.74023                | BCL11A   | 1.69342                | FBXO41    | 1.65913                | NBEA     | 1.60724                | THEM4      | 1.570199               |
| AEBP1     | 1.860769               | PTER      | 1.80444                | VPS36   | 1.73997                | CD164    | 1.69284                | OSGEPL1   | 1.65882                | THTPA    | 1.60451                | MPEG1      | 1.568859               |
| ELMSAN1   | 1.855011               | PYCARD    | 1.79871                | CROT    | 1.73877                | MPIG6B   | 1.6914                 | PLCB2     | 1.65786                | WDR81    | 1.60369                | RUNX2      | 1.560398               |
| PTPN6     | 1.854454               | 43160     | 1.79791                | PLK2    | 1.73598                | ZDHH23   | 1.69101                | C14orf159 | 1.65237                | KLHL13   | 1.60041                | STK11IP    | 1.559116               |
| NAT8L     | 1.854275               | PLXNA4    | 1.79616                | ALAD    | 1.73312                | NIN      | 1.68967                | SNTA1     | 1.65172                | RFLNB    | 1.60029                | MSL2       | 1.558554               |
| FAM213A   | 1.854115               | EHMT2     | 1.79449                | SMAD3   | 1.73078                | PLPP1    | 1.68916                | APOBEC3F  | 1.65166                | POMGNT1  | 1.59956                | TBC1D5     | 1.556834               |
| SLITRK5   | 1.850623               | SCARB1    | 1.7935                 | ZNF589  | 1.72949                | DEF6     | 1.68562                | EPDR1     | 1.6496                 | MOSPD2   | 1.5993                 | S100PBP    | 1.556288               |
| CRIP1     | 1.849202               | SLC2A1    | 1.7933                 | NAALAD2 | 1.72779                | BTLA     | 1.68527                | CPT1A     | 1.64752                | CMTM3    | 1.59803                | FAM160A1   | 1.55619                |
| ADAMTS4   | 1.849086               | FCRLA     | 1.791                  | CLN8    | 1.72475                | CHURC1   | 1.68428                | SCAI      | 1.64711                | TECPR1   | 1.59765                | HHLA3      | 1.555042               |
| CARD11    | 1.846084               | NREP      | 1.78928                | SEMA4D  | 1.72415                | PDSS2    | 1.68403                | THRA      | 1.64486                | UBE2E2   | 1.59668                | ST3GAL4    | 1.554627               |
| IMPACT    | 1.844453               | VMAC      | 1.7846                 | CA8     | 1.72237                | MARVELD1 | 1.6823                 | SLC27A3   | 1.64139                | GATB     | 1.59303                | WDFY4      | 1.554404               |
| DHODH     | 1.844429               | C16orf54  | 1.78368                | TXNDC5  | 1.71947                | TMIGD2   | 1.67871                | TTL12     | 1.64035                | CETP     | 1.59272                | DBP        | 1.553732               |
| HDAC9     | 1.843091               | GNF7      | 1.78234                | APOBR   | 1.71827                | OAS1     | 1.67797                | UBE2J1    | 1.6401                 | STK17B   | 1.59126                | GUCY1A3    | 1.553269               |
| MCC       | 1.840186               | MYO1E     | 1.78201                | FLOT2   | 1.71454                | TMEM144  | 1.67659                | SIRPB1    | 1.63585                | SIGLEC6  | 1.59124                | TMEM107    | 1.551555               |
| ZNF607    | 1.839793               | PPM1M     | 1.7774                 | FAM221B | 1.71318                | SORBS3   | 1.6764                 | ARHGEF6   | 1.63206                | TMEM242  | 1.5902                 | HACD4      | 1.550519               |
| KIF17     | 1.838859               | SYNJ2BP   | 1.77432                | ZNF438  | 1.71051                | FAM117A  | 1.67529                | MMP25     | 1.63001                | ALDH3B1  | 1.58987                | FCMR       | 1.55042                |
| SCRN1     | 1.836454               | TMEM53    | 1.77337                | ERMP1   | 1.71025                | STIM1    | 1.67422                | SLC20A1   | 1.62694                | RCCD1    | 1.58941                | MED12L     | 1.549428               |
| PPP1R13L  | 1.834954               | BBC3      | 1.77144                | LYL1    | 1.71021                | C3orf58  | 1.67368                | PREX1     | 1.62592                | LRRC1    | 1.58891                |            |                        |
| PARP10    | 1.833772               | P3H2      | 1.771                  | ARHGDB  | 1.70923                | SLC44A2  | 1.67222                | FAN1      | 1.62464                | RNASE6   | 1.5886                 |            |                        |
| SCML2     | 1.828339               | PPM1F     | 1.76911                | RNASEL  | 1.70734                | COL24A1  | 1.67026                | POLA1     | 1.62451                | DUSP1    | 1.5875                 |            |                        |
| TMEM210   | 1.826608               | ZNF469    | 1.76711                |         |                        |          |                        |           |                        |          |                        |            |                        |
| CLUSTER 5 |                        |           |                        |         |                        |          |                        |           |                        |          |                        |            |                        |
| DEG       | FC (log <sub>2</sub> ) | DEG       | FC (log <sub>2</sub> ) | DEG     | FC (log <sub>2</sub> ) | DEG      | FC (log <sub>2</sub> ) | DEG       | FC (log <sub>2</sub> ) | DEG      | FC (log <sub>2</sub> ) | DEG        | FC (log <sub>2</sub> ) |
| ITGB8     | -7.35802               | TNFRSF12A | -4.9512                | NKD2    | -4.2715                | KHDRBS3  | -3.7598                | ST8SIA4   | -3.52093               | RGS9     | -3.3157                | C17orf99   | -3.13554               |
| ECCL1     | -6.51225               | CXCL8     | -4.8359                | RAMP1   | -4.0276                | TOGARAM2 | -3.7274                | RAB7B     | -3.5052                | ANKRD33B | -3.2748                | NINJ1      | -3.1196                |
| AVP       | -6.31372               | C15orf48  | -4.6744                | IL4I1   | -4.0051                | KSR1     | -3.7216                | CLECL1    | -3.48558               | MACC1    | -3.2643                | SMARCA1    | -3.09589               |
| TNFRSF9   | -5.81803               | SPSB1     | -4.5451                | PEL1    | -3.9999                | LMNA     | -3.6825                | TNFSF4    | -3.48496               | NUAK2    | -3.2569                | AIM1       | -3.08527               |
| TRH       | -5.74118               | CTNNAL1   | -4.4758                | BCAN    | -3.9921                | DEPDC7   | -3.6805                | CACNA1G   | -3.4564                | SIPA1L1  | -3.2176                | ADTRP      | -3.07417               |
| CCR7      | -5.69939               | INHBA     | -4.4576                | LGALS3  | -3.8467                | WNT9A    | -3.6771                | DKK4      | -3.44069               | CD9      | -3.2117                | CD69       | -3.04501               |
| GPR157    | -5.6783                | BMP6      | -4.4531                | MARCKS  | -3.819                 | B3GNT5   | -3.6393                | TGIF1     | -3.37978               | FAM222A  | -3.2036                | IKZF2      | -3.03664               |
| CCL22     | -5.28399               | NRP2      | -4.41                  | NCMAP   | -3.8152                | KCNE5    | -3.6232                | AHR       | -3.37825               | NRIP3    | -3.196                 | BIRC3      | -3.02975               |
| PALLD     | -5.07311               | DUSP4     | -4.3881                | SLC6A12 | -3.7936                | TNFRSF18 | -3.5903                | SERPINB9  | -3.34639               | TFPI     | -3.1828                | CTSL       | -3.02006               |
| BCL2A1    | -5.06808               |           |                        |         |                        |          |                        |           |                        |          |                        |            |                        |

\*Relative fold-change (log<sub>2</sub> values) of DEG using non-TME samples (dLNneg) as the reference. DEG = differentially expressed genes. FC = fold-change.

**Supplemental Table 5: Flow cytometry antibodies**

| FACS-Sorting Cocktails (Human)                |                             |                                          |                 |             |          |
|-----------------------------------------------|-----------------------------|------------------------------------------|-----------------|-------------|----------|
| Antigen                                       | Fluorochrome                | Clone                                    | Company         | Catalog No. | Dilution |
| Live/Dead                                     | Aqua<br>(405 nm excitation) | n/a                                      | ThermoFisher    | L34965      | 1:100    |
| CD45                                          | BUV395                      | HI30                                     | BD Biosciences  | 563792      | 1:40     |
| HLA-A2                                        | V450                        | BB7.2                                    | BD Biosciences  | 561344      | 1:30     |
| HLA-A2                                        | PE                          | BB7.2                                    | BD Biosciences  | 558570      | 1:30     |
| HLA-DR                                        | APC-Cy7                     | L243                                     | BioLegend       | 307618      | 1:25     |
| CD11c                                         | BUV395                      | B-ly6                                    | BD Biosciences  | 563787      | 1:20     |
| CD11c                                         | APC                         | 3.9                                      | BioLegend       | 301614      | 1:20     |
| CD123                                         | PE                          | 7G3                                      | BD Biosciences  | 554529      | 1:30     |
| CD303                                         | PerCP-Cy5.5                 | BDCA-2                                   | BioLegend       | 354209      | 1:20     |
| CD134/OX40                                    | BV421                       | ACT35                                    | BioLegend       | 350014      | 1:30     |
| CD134/OX40                                    | APC-Cy7                     | ACT35                                    | BioLegend       | 350022      | 1:30     |
| FACS-Sorting Cocktails (Mouse)                |                             |                                          |                 |             |          |
| Antigen                                       | Fluorochrome                | Clone                                    | Company         | Catalog No. | Dilution |
| Live/Dead                                     | Aqua<br>(405 nm excitation) | n/a                                      | ThermoFisher    | L34965      | 1:100    |
| CD45                                          | Pacific Blue                | 30-F11                                   | BioLegend       | 103126      | 1:40     |
| CD45R/B220                                    | APC-Cy7                     | RA3-6B2                                  | BioLegend       | 103236      | 1:50     |
| CD317/BST2/<br>PDCA-1                         | PE                          | 129c                                     | ThermoFisher,   | 12-3171-82  | 1:30     |
| CD11c                                         | PE-Cy7                      | N418                                     | BioLegend       | 117318      | 1:40     |
| CD11b                                         | FITC                        | M1/70                                    | BioLegend       | 101206      | 1:50     |
| Flow Cytometry Phenotyping Antibodies (Human) |                             |                                          |                 |             |          |
| Antigen                                       | Fluorochrome                | Clone                                    | Company         | Catalog No. | Dilution |
| Live/Dead                                     | Aqua<br>(405 nm excitation) | n/a                                      | ThermoFisher    | L34965      | 1:100    |
| CD45                                          | BUV395                      | HI30                                     | BD Biosciences  | 563792      | 1:40     |
| CD3                                           | APC-R700                    | UCHT1                                    | BD Biosciences  | 565119      | 1:40     |
| CD3                                           | PE-CF594                    | SP34-2                                   | BD Biosciences  | 562406      | 1:40     |
| CD8                                           | BB515                       | RPA-T8                                   | BD Biosciences  | 564526      | 1:40     |
| CD8                                           | AlexaFluor647               | RPA-T8                                   | BD Biosciences  | 557708      | 1:40     |
| CD4                                           | PerCP-Cy5.5                 | OKT4                                     | BioLegend       | 317428      | 1:40     |
| HLA-DR                                        | APC-Cy7                     | L243                                     | BioLegend       | 307618      | 1:25     |
| HLA-DR                                        | BV421                       | G46-6                                    | BD Biosciences  | 562805      | 1:30     |
| Lineage (CD3/CD14/<br>CD19/CD20/ CD56)        | FITC                        | UCHT1/<br>HCD14/HIB1<br>9/ 2H7/<br>HCD56 | BioLegend       | 348701      | 1:40     |
| CD11c                                         | BUV395                      | B-ly6                                    | BD Biosciences  | 563787      | 1:20     |
| CD11c                                         | APC                         | 3.9                                      | BioLegend       | 301614      | 1:20     |
| CD123                                         | PE                          | 7G3                                      | BD Biosciences  | 554529      | 1:30     |
| CD303                                         | PerCP-Cy5.5                 | BDCA-2                                   | BioLegend       | 354209      | 1:20     |
| CD134/OX40                                    | BV421                       | ACT35                                    | BioLegend       | 350014      | 1:30     |
| CD134/OX40                                    | APC-Cy7                     | ACT35                                    | BioLegend       | 350022      | 1:30     |
| CD252/OX40(L)                                 | BV421                       | ik-1                                     | BD Biosciences  | 563766      | 1:20     |
| CD275/ICOS(L)                                 | PE-CF594                    | 2D3/ B7-<br>H2                           | BD Biosciences  | 564277      | 1:25     |
| CD40                                          | PE                          | HB14                                     | BioLegend       | 313006      | 1:30     |
| CD80                                          | APC                         | 2D10                                     | BioLegend       | 305220      | 1:30     |
| CD86                                          | AlexaFluor700               | 2331/ FUN-1                              | BD Biosciences  | 561124      | 1:30     |
| CD25                                          | AlexaFluor488               | M-A251                                   | BioLegend       | 356116      | 1:30     |
| CD137/4-1BB                                   | PE-Cy7                      | 4B4-1                                    | BioLegend       | 309818      | 1:30     |
| CD253/TRAIL                                   | BV421                       | RIK-2                                    | BD Biosciences  | 564243      | 1:30     |
| CD327/Siglec-6                                | APC                         | REA852                                   | Miltenyi Biotec | 130112711   | 1:20     |
| Axl                                           | AlexaFluor700               | FAB154N                                  | R&D             | 108724      | 1:20     |
| CD69                                          | APC/Fire750                 | FN50                                     | BioLegend       | 310946      | 1:30     |
| CD11b                                         | BB515                       | ICRF44                                   | BD Biosciences  | 564517      | 1:30     |
| CD14                                          | PerCP-Cy5.5                 | HCD14                                    | BioLegend       | 325622      | 1:30     |
| CD15                                          | AlexaFluor700               | W6D3                                     | BioLegend       | 323026      | 1:30     |
| CD68                                          | PE-Cy7                      | Y1/82A                                   | BioLegend       | 333816      | 1:30     |
| Tbet                                          | PerCP-Cy5.5                 | 4B10                                     | BioLegend       | 644806      | 1:25     |
| IFN-γ                                         | APC-Cy7                     | 4S.B3                                    | BioLegend       | 502530      | 1:25     |
| FoxP3                                         | PE                          | 259D/C7                                  | BD Biosciences  | 560046      | 1:30     |
| IFN-γ                                         | BV711                       | B27                                      | BD Biosciences  | 564039      | 1:25     |
| IL-12p70                                      | PE                          | 20C2                                     | BD Biosciences  | 559325      | 1:25     |
| Granzyme B (GzB)                              | AlexaFluor700               | GB11                                     | BD Biosciences  | 560213      | 1:30     |
| GzB                                           | FITC                        | GB11                                     | BioLegend       | 515403      | 1:30     |

| Flow Cytometry Phenotyping Antibodies (Mouse) |               |          |                |             |          |
|-----------------------------------------------|---------------|----------|----------------|-------------|----------|
| Antigen                                       | Fluorochrome  | Clone    | Company        | Catalog No. | Dilution |
| CD45                                          | BUV395        | 30 F11   | BD Biosciences | 564279      | 1:40     |
| CD3                                           | AlexaFluor700 | 17A2     | BioLegend      | 100216      | 1:40     |
| CD11b                                         | FITC          | M1/70    | BioLegend      | 101206      | 1:50     |
| CD11c                                         | PE-Cy7        | N418     | BioLegend      | 117318      | 1:40     |
| CD45R/B220                                    | PerCP-Cy5.5   | RA3-6B2  | BioLegend      | 103236      | 1:50     |
| CD317/BST2 PDCA-1                             | PE            | 129c     | ThermoFisher   | 12-3171-82  | 1:30     |
| CD8a                                          | BV421         | 53-6.7   | BioLegend      | 100737      | 1:40     |
| CD4                                           | APC-Cy7       | GK1.5    | BioLegend      | 100414      | 1:50     |
| CD134/OX40                                    | APC           | OX86     | BioLegend      | 119414      | 1:30     |
| CD252/OX40(L)                                 | eFluor710     | RM134L   | ThermoFisher   | 46590580    | 1:25     |
| CD252/OX40(L)                                 | PE-Cy7        | RM134L   | BioLegend      | 108813      | 1:20     |
| CD103                                         | PE-CF594      | M290     | BD Biosciences | 565849      | 1:20     |
| Ly-6G                                         | APC           | 1A8      | BioLegend      | 127614      | 1:25     |
| Ly6c                                          | FITC          | HK1.4    | BioLegend      | 128006      | 1:40     |
| Gr1                                           | APC-Cy7       | RB6-8C5  | BioLegend      | 108424      | 1:40     |
| FoxP3                                         | PE            | 259D/C7  | BD Biosciences | 560046      | 1:30     |
| TNF- $\alpha$                                 | APC           | MP6-XT22 | BioLegend      | 506308      | 1:40     |
| IL-12p40                                      | PE            | C15.6    | BioLegend      | 505204      | 1:30     |
| IFN- $\gamma$                                 | PE-Cy7        | XMG1.2   | BioLegend      | 505826      | 1:30     |
